# Supplementary material for: Impact of metformin treatment during pregnancy on maternal outcomes: a systematic review/meta-analysis
Source: Research Square preprint supplement (doi:10.21203/rs.3.rs-112670/v1), 2020-11-30
Supplement: Supplementary file 1 [file 084f8775a14e0f72e662ef26.docx]

| **Primary maternal outcomes of metformin treatment during pregnancy** | | | | | |
| --- | --- | --- | --- | --- | --- |
| **Patient or population**: Women prescribed metformin for any indication during pregnancy  **Setting**:  **Intervention**: Metformin  **Comparison**: Any comparator | | | | | |
| **Outcomes** | **№ of participants  (studies) Follow up** | **Certainty of the evidence (GRADE)** | **Relative effect (95% CI)** | **Anticipated absolute effects** | |
| **Risk with any comparator** | **Risk difference with Metformin** |
| Pregnancy-induced hypertension (all studies) | 4189 (14 RCTs) | ⨁⨁⨁⨁ HIGH | **OR 0.97** (0.77 to 1.22) | 78 per 1,000 | **2 fewer per 1,000** (17 fewer to 16 more) |
| Gestational age at delivery | 3081 (17 RCTs) | ⨁⨁⨁◯ MODERATE a | - | The mean gestational age at delivery was **38.2** weeks | MD **0.07 weeks lower** (0.21 lower to 0.06 higher) |
| GWG (through pregnancy) | 2522 (13 RCTs) | ⨁⨁⨁◯ MODERATE b | - | The mean GWG (through pregnancy) was **10.5** kg | MD **1.55 kg lower** (2.19 lower to 0.91 lower) |
| Preterm: All causes (all studies) | 6959 (27 RCTs) | ⨁⨁⨁◯ MODERATE c | **OR 0.91** (0.67 to 1.22) | 96 per 1,000 | **8 fewer per 1,000** (29 fewer to 19 more) |
| ***The risk in the intervention group** (and its 95% confidence interval) is based on the assumed risk in the comparison group and the **relative effect** of the intervention (and its 95% CI).   **CI:** Confidence interval; **OR:** Odds ratio; **MD:** Mean difference | | | | | |

**Supplementary Fig S5: GRADE analysis – primary outcomes**

GRADE analysis for all primary outcomes

GWG=gestational weight gain; RCTs=randomised controlled trials.

Odds Ratio or mean difference (where appropriate) ± 95% CI. Fixed or random-effect models where appropriate.

| **GRADE Working Group grades of evidence** **High certainty:** We are very confident that the true effect lies close to that of the estimate of the effect **Moderate certainty:** We are moderately confident in the effect estimate: The true effect is likely to be close to the estimate of the effect, but there is a possibility that it is substantially different **Low certainty:** Our confidence in the effect estimate is limited: The true effect may be substantially different from the estimate of the effect **Very low certainty:** We have very little confidence in the effect estimate: The true effect is likely to be substantially different from the estimate of effect |
| --- |

#### Explanations

a. The data set indicates a modest heterogeneity throughout studies as evidenced by the I2 value of 47%, with accompanying modest p value of 0.02.

b. The data set indicates a very high heterogeneity throughout studies as evidenced by the I2 value of 87%, with accompanying p value of <0.00001.

c. The data set indicates a fairly high heterogeneity throughout studies as evidenced by the I2 value of 58%, with accompanying p value of <0.0001.
