# Supplementary material for: Impact of metformin treatment during pregnancy on maternal outcomes: a systematic review/meta-analysis
Source: Research Square preprint supplement (doi:10.21203/rs.3.rs-112670/v1), 2020-11-30
Supplement: Supplementary file 8 [file 519e348ef37fd8229ef7aa47.docx]

**Supplementary Information**

**Impact of metformin treatment during pregnancy on maternal outcomes: a systematic review/meta-analysis.**

**Authors:** Jane L. TARRY-ADKINS, BSc, Susan E. OZANNE, PhD, Catherine E. AIKEN, MB/BChir, PhD

**Supplementary Fig. S1: Sensitivity Analysis: Leave low-quality studies out**

**c)** Preeclampsia: Metformin vs. all interventions

**a)** Gestational weight gain (throughout pregnancy): Metformin vs. all interventions


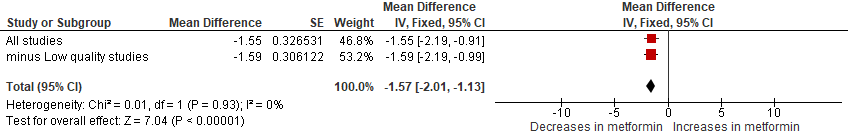

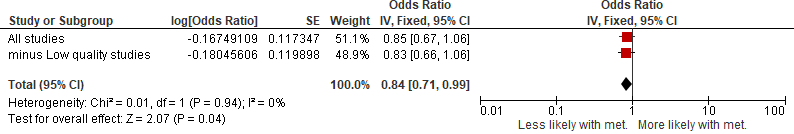


**b)** Pregnancy induced hypertension: Metformin vs. all interventions


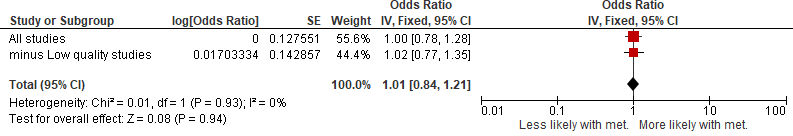


**d)** Gestational age at delivery: Metformin vs. all interventions


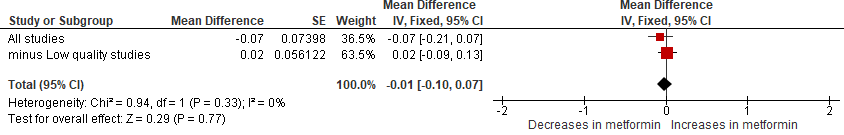


**e)** Preterm: Metformin vs. all interventions


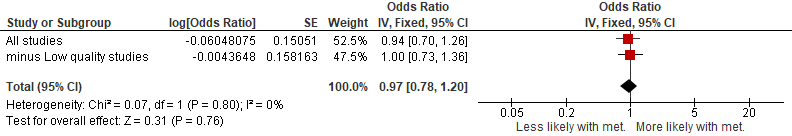


**Supplementary Fig. S1: Sensitivity Analysis: Leave low-quality studies out (continued)**

**g)** Development of GDM: Metformin vs. all interventions

No studies reporting this outcome were low quality

**f)** C-section rates: Metformin vs. all interventions


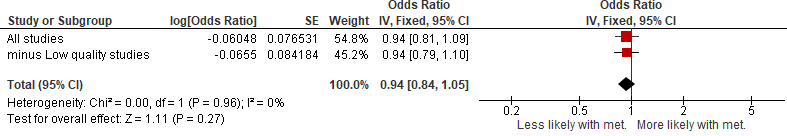


Sensitivity analysis of outcome measures when low-quality studies were removed.

C-section=ceserean-section; GDM=gestational diabetes mellitus; met=metformin.

Odds Ratio or mean difference (where appropriate) ± 95% CI. Fixed or random-effect models where appropriate.

**Supplementary Fig S2: Sensitivity analysis: Leave-one-out**

**b)** Pre-eclampsia: Metformin vs. all interventions


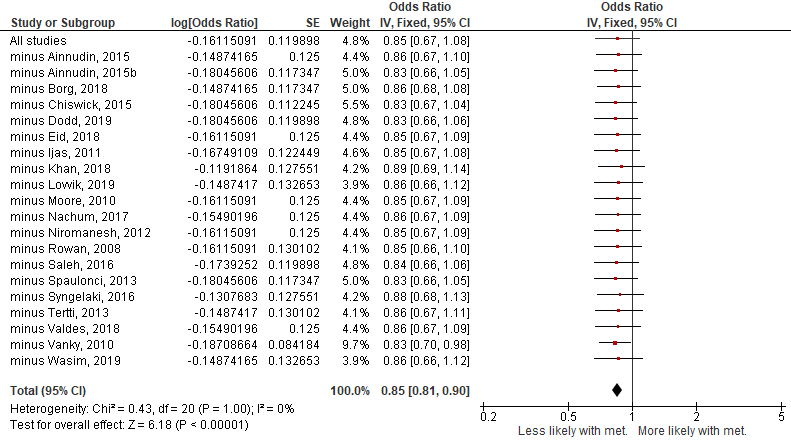

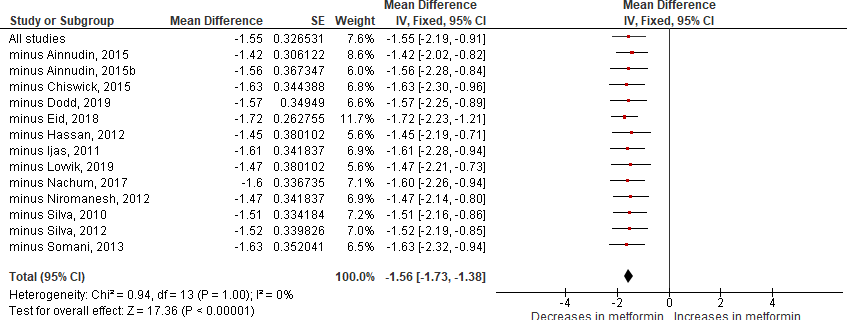


**a)** Gestational weight gain: Metformin vs. all interventions

**a)** Gestational weight gain (throughout pregnancy)

**b)** Pregnancy-induced hypertension

**c)** Pre-eclampsia

**d)** Gestational age at delivery


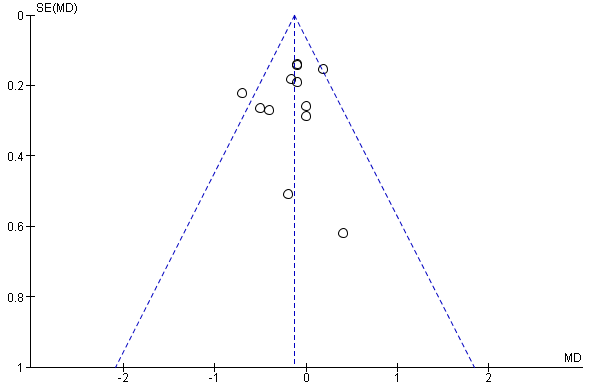


**e)** Preterm (all causes)

**f)** Preterm (spontaneous)


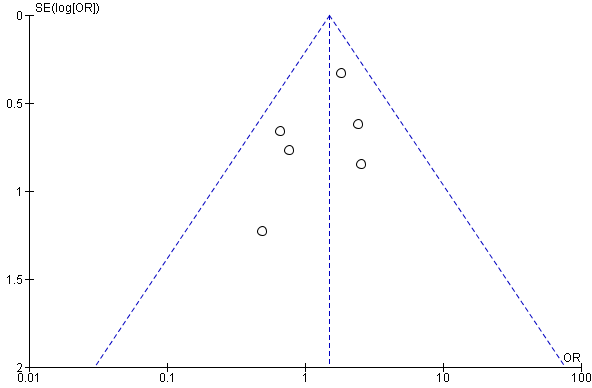

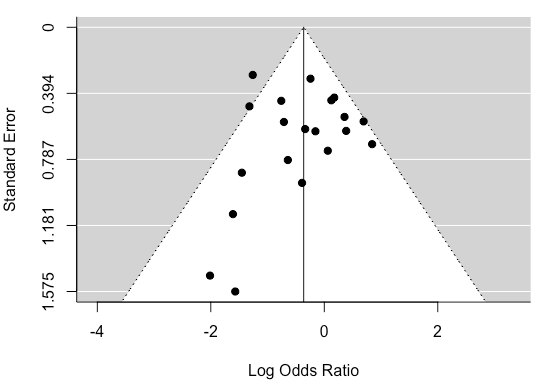

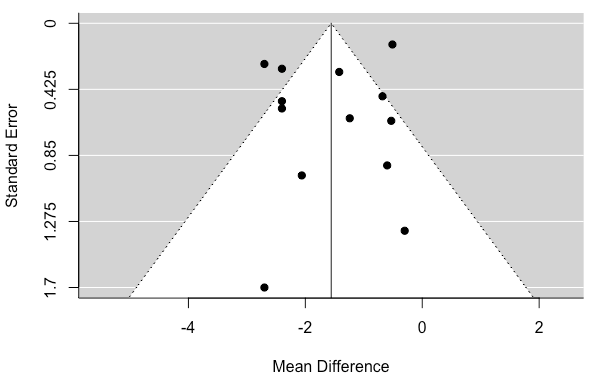

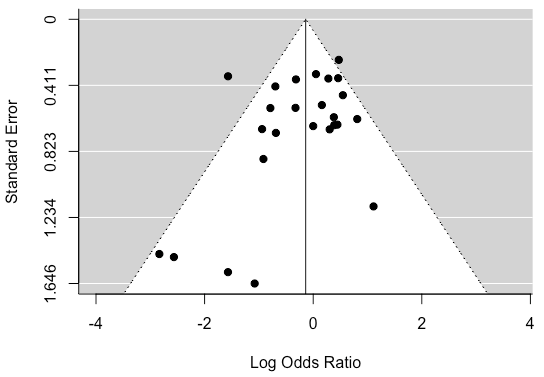

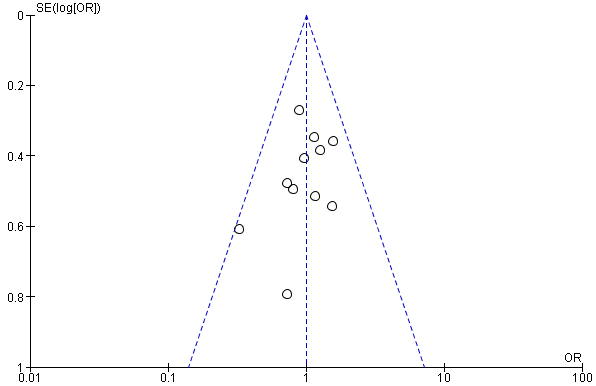


**Supplementary Fig S3: Funnel Plots**

**g)** Ceserean section rate

**h)** Incidence of GDM


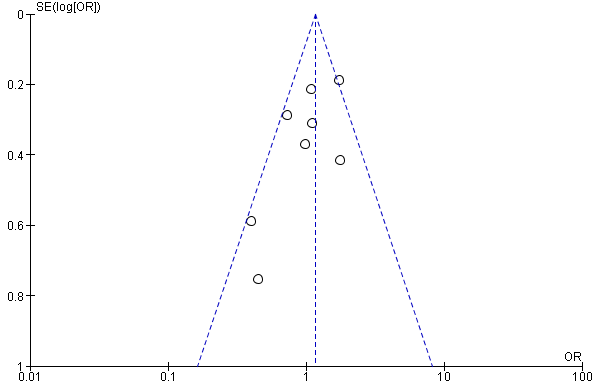

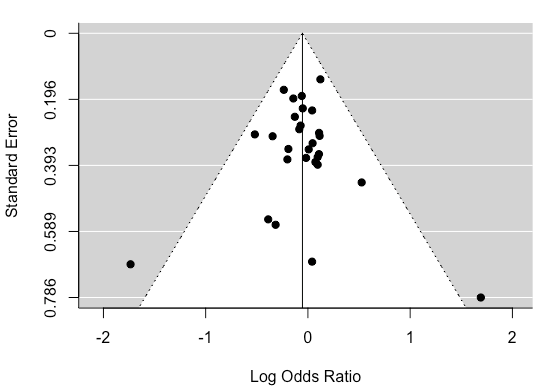


**Supplementary Fig. S3: Funnel Plots (continued)**

Funnel Plot analysis

C-section=ceserean-section; GDM=gestational diabetes mellitus; met=metformin.

Odds Ratio or mean difference (where appropriate) ± 95% CI. Fixed or random-effect models where appropriate.

| **Primary maternal outcomes of metformin treatment during pregnancy** | | | | | |
| --- | --- | --- | --- | --- | --- |
| **Patient or population**: Women prescribed metformin for any indication during pregnancy  **Setting**:  **Intervention**: Metformin  **Comparison**: Any comparator | | | | | |
| **Outcomes** | **№ of participants  (studies) Follow up** | **Certainty of the evidence (GRADE)** | **Relative effect (95% CI)** | **Anticipated absolute effects** | |
| **Risk with any comparator** | **Risk difference with Metformin** |
| Pregnancy-induced hypertension (all studies) | 4189 (14 RCTs) | ⨁⨁⨁⨁ HIGH | **OR 0.97** (0.77 to 1.22) | 78 per 1,000 | **2 fewer per 1,000** (17 fewer to 16 more) |
| Gestational age at delivery | 3081 (17 RCTs) | ⨁⨁⨁◯ MODERATE a | - | The mean gestational age at delivery was **38.2** weeks | MD **0.07 weeks lower** (0.21 lower to 0.06 higher) |
| GWG (through pregnancy) | 2522 (13 RCTs) | ⨁⨁⨁◯ MODERATE b | - | The mean GWG (through pregnancy) was **10.5** kg | MD **1.55 kg lower** (2.19 lower to 0.91 lower) |
| Preterm: All causes (all studies) | 6959 (27 RCTs) | ⨁⨁⨁◯ MODERATE c | **OR 0.91** (0.67 to 1.22) | 96 per 1,000 | **8 fewer per 1,000** (29 fewer to 19 more) |
| ***The risk in the intervention group** (and its 95% confidence interval) is based on the assumed risk in the comparison group and the **relative effect** of the intervention (and its 95% CI).   **CI:** Confidence interval; **OR:** Odds ratio; **MD:** Mean difference | | | | | |

**Supplementary Fig S4: GRADE analysis – primary outcomes**

**Supplementary Fig S4: GRADE analysis – primary outcomes (continued)**

| **GRADE Working Group grades of evidence** **High certainty:** We are very confident that the true effect lies close to that of the estimate of the effect **Moderate certainty:** We are moderately confident in the effect estimate: The true effect is likely to be close to the estimate of the effect, but there is a possibility that it is substantially different **Low certainty:** Our confidence in the effect estimate is limited: The true effect may be substantially different from the estimate of the effect **Very low certainty:** We have very little confidence in the effect estimate: The true effect is likely to be substantially different from the estimate of effect |
| --- |

Explanations

a. The data set indicates a modest heterogeneity throughout studies as evidenced by the I2 value of 47%, with accompanying modest p value of 0.02.

b. The data set indicates a very high heterogeneity throughout studies as evidenced by the I2 value of 87%, with accompanying p value of <0.00001.

c. The data set indicates a fairly high heterogeneity throughout studies as evidenced by the I2 value of 58%, with accompanying p value of <0.0001.

GRADE analysis for all primary outcomes

GWG=gestational weight gain; RCTs=randomised controlled trials.

Odds Ratio or mean difference (where appropriate) ± 95% CI. Fixed or random-effect models where appropriate.

**Supplementary Fig S5: GRADE analysis – secondary outcomes**

| **Metformin compared to any comparator for women prescribed metformin for any indication during pregnancy: Secondary outcomes** | | | | | |
| --- | --- | --- | --- | --- | --- |
| **Patient or population**: women prescribed metformin for any indication during pregnancy  **Setting**:  **Intervention**: Metformin  **Comparison**: Any comparator | | | | | |
| **Outcomes** | **№ of participants  (studies) Follow up** | **Certainty of the evidence (GRADE)** | **Relative effect (95% CI)** | **Anticipated absolute effects** | |
| **Risk with any comparator** | **Risk difference with Metformin** |
| C-section (all reasons) | 6122 (29 RCTs) | ⨁⨁⨁◯ MODERATE a | **OR 0.86** (0.73 to 1.01) | 425 per 1,000 | **36 fewer per 1,000** (75 fewer to 2 more) |
| Development of GDM | 2063 (7 RCTs) | ⨁⨁⨁◯ MODERATE b | **OR 1.07** (0.87 to 1.33) | 208 per 1,000 | **11 more per 1,000** (22 fewer to 51 more) |
| Glycaemic control: FBS | 3673 (19 RCTs) | ⨁⨁⨁◯ MODERATE c | - | The mean glycaemic control: FBS was **90.23** mg/dL | MD **0.45 mg/dL lower** (2.26 lower to 1.36 higher) |
| Glycaemic control: RBS | 3610 (18 RCTs) | ⨁⨁⨁◯ MODERATE d | - | The mean glycaemic control: RBS ranged from **115.47** mg/dL | MD **1.18 mg/dL lower** (2.64 lower to 0.28 higher) |
| Maternal hypoglycaemia | 1149 (6 RCTs) | ⨁⨁⨁◯ MODERATE e | **OR 0.47** (0.28 to 0.80) | 78 per 1,000 | **40 fewer per 1,000** (55 fewer to 15 fewer) |

| ***The risk in the intervention group** (and its 95% confidence interval) is based on the assumed risk in the comparison group and the **relative effect** of the intervention (and its 95% CI).   **CI:** Confidence interval; **OR:** Odds ratio; **MD:** Mean difference |
| --- |
| **GRADE Working Group grades of evidence** **High certainty:** We are very confident that the true effect lies close to that of the estimate of the effect **Moderate certainty:** We are moderately confident in the effect estimate: The true effect is likely to be close to the estimate of the effect, but there is a possibility that it is substantially different **Low certainty:** Our confidence in the effect estimate is limited: The true effect may be substantially different from the estimate of the effect **Very low certainty:** We have very little confidence in the effect estimate: The true effect is likely to be substantially different from the estimate of effect |

#### Explanations

a. The data set has a fairly high level of heterogeneity across the studies as evidenced by the I2 value (46%) and the accompanying significant p value (0.004).

b. Only n=7 studies were found for this outcome, most of which had large 95% CI intervals (related to small participant sizes).

c. The data set has a very high level of heterogeneity across the studies as evidenced by the I2 value (92%) and the accompanying p value (<0.00001).

d. The data set has a very high level of heterogeneity across the studies as evidenced by the I2 value (83%) and the accompanying significant p value (<0.00001)

e. Only n=6 studies were found for this outcome, most of which had large 95% CI intervals (related to relatively small participant sizes).

C-section=ceserean-section; FBS=fasting blood glucose; RBS=random blood glucose; GDM=gestational diabetes mellitus; met=metformin; RCTs=randomised controlled trials.

Odds Ratio or mean difference (where appropriate) ± 95% CI. Fixed or random-effect models where appropriate.

**Supplementary Fig S6: New GDM development**


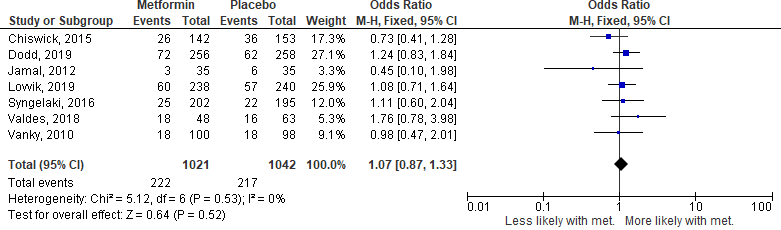


New GDM development

GDM=gestational diabetes mellitus; met=metformin.

Odds Ratio ± 95% CI. Fixed or random-effect model.

**Supplementary Fig S7: Glycaemic control**

**a)** FBS


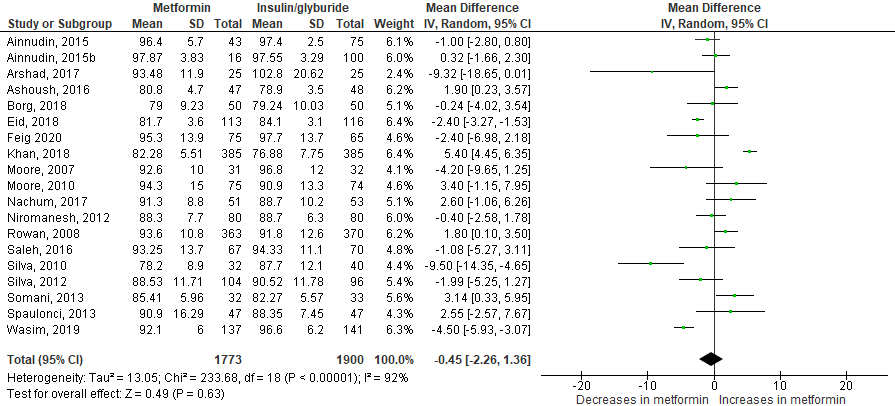


**b)** RBS


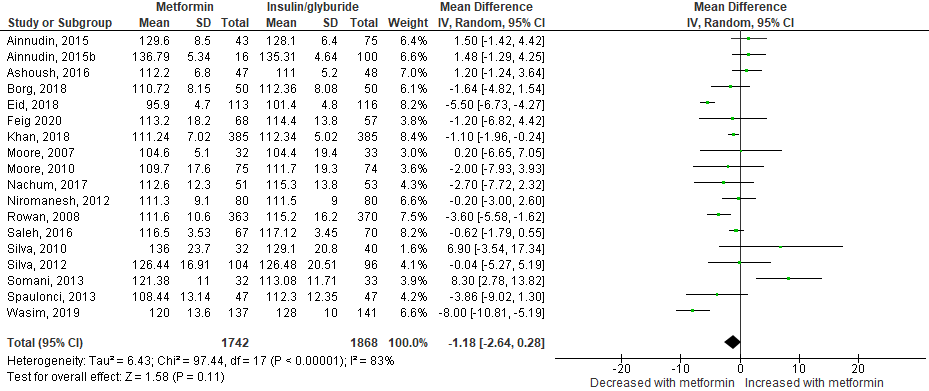


**c)** Maternal hypoglycemia


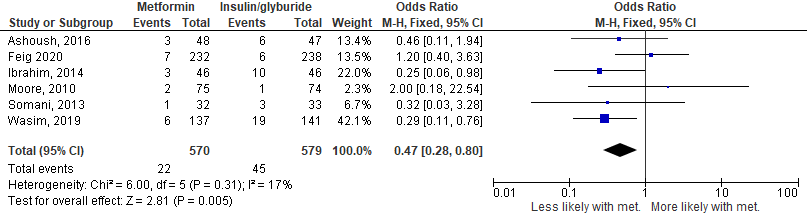


Maternal glycaemic control (including FBS, RBS and maternal hypoglycaemia)

Mean differences and Odds Ratios (where appropriate) ± 95% CI.

FBS=fasting plasma glucose; RBS=random blood glucose; met=metformin

**Supplementary Table S1: Inclusion/Exclusion table**


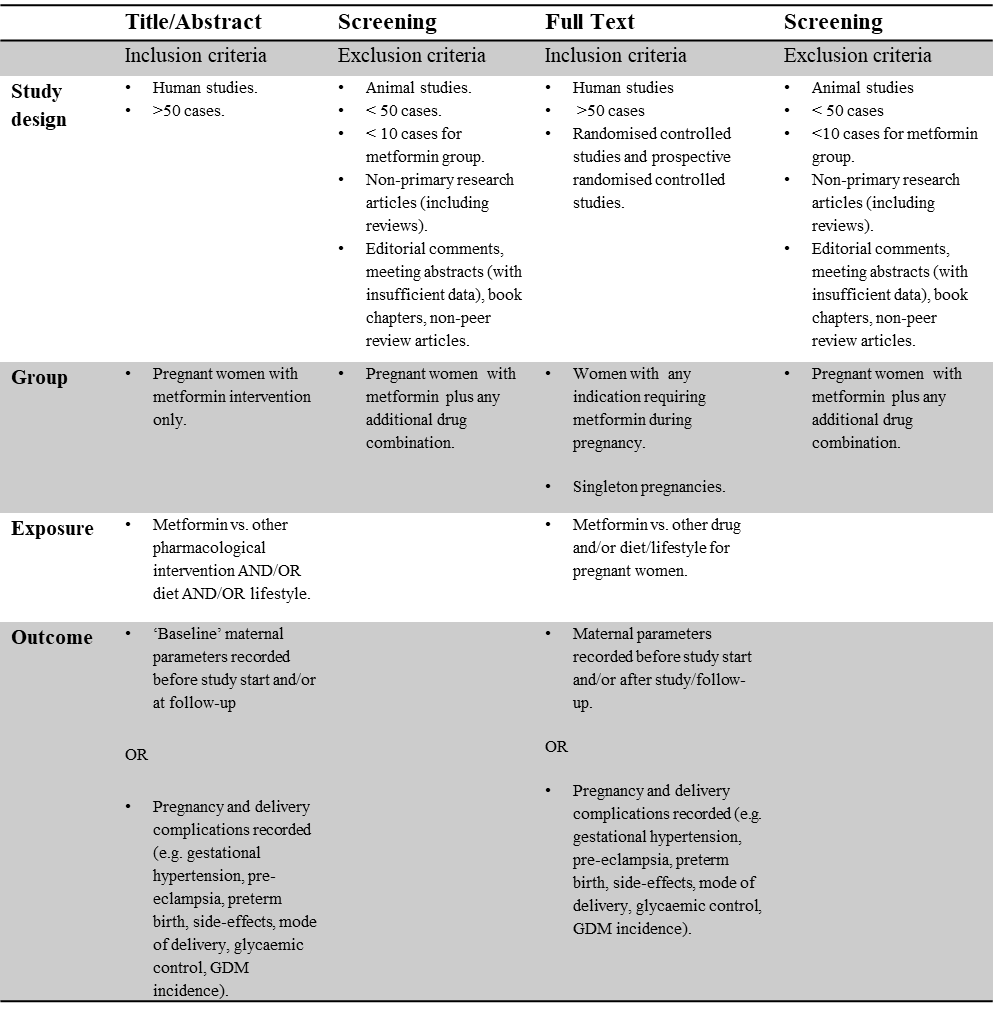


Inclusion/exclusion criteria

GDM=gestational diabetes mellitus

**Supplementary Table S2: Risk of Bias**


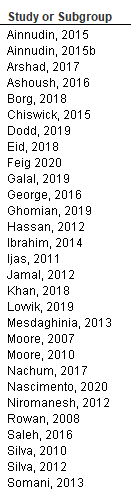

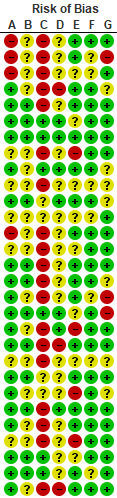

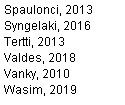

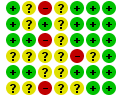

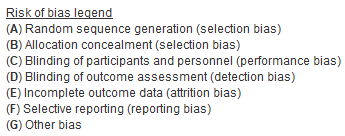


Risk of Bias analysis

Green circles=low risk of bias; yellow circles=unknown risk of bias; red circles=high risk of bias

**Supplementary Table S3: Study characteristics table**

Separate excel spread-sheet

**Supplementary Table S4: GDM/PCOS/maternal obesity diagnosis criteria**


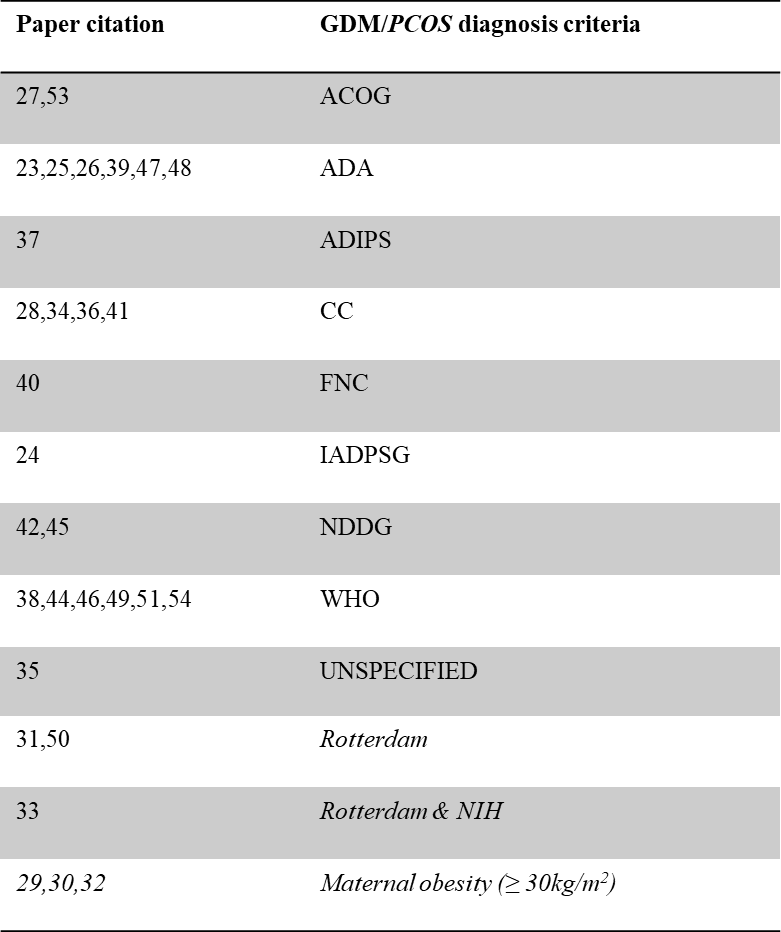

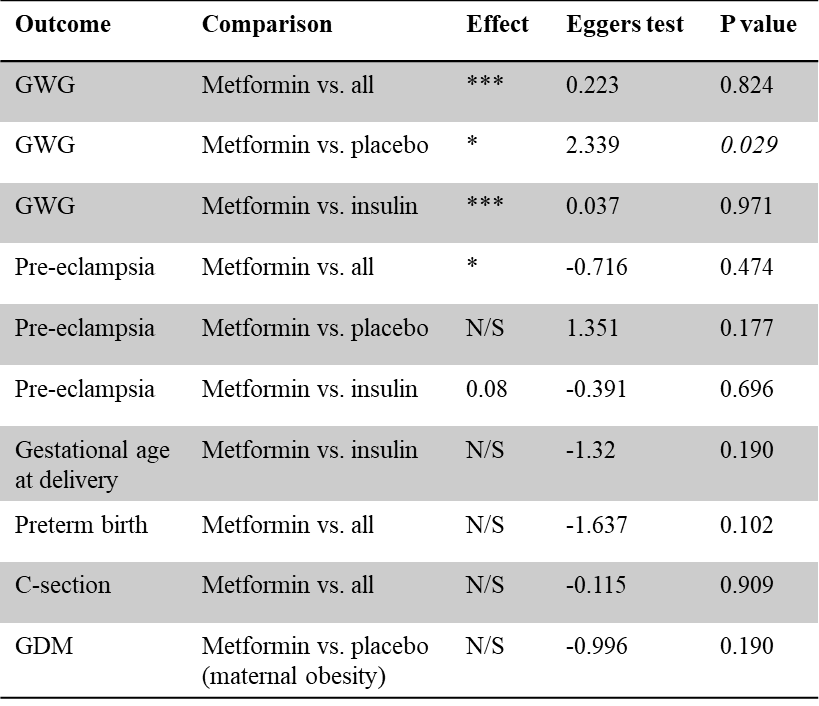


Heterogeneity diagnosis for GDM/PCOS/maternal obesity diagnosis

ADA=American Diabetes Association; ADIPS=Australasian Diabetes in Pregnancy Society; CC=Carpenter-Coustan; FNC=Finnish National Criteria; GDM=gestational diabetes mellitus; IADPSG= International Association of Diabetes and Pregnancy Study Groups;  NDDG= National Diabetes Diagnosis Group; NIH=National Institute of Health; PCOS=polycystic ovary syndrome; WHO=World Health Organisation

Eggers Testing for publication bias

C-section=Cesarean-section; GDM=Gestational Diabetes Mellitus; GWG=gestational weight gain

**Supplementary Table S5: Eggers Test**

**Supplementary Table S6: Effect of metformin treatment upon side effects (vs. placebo: PCOS and maternal obesity)**

| Outcome |  | Unadjusted OR  (95% CI) | P value | Studies | N | Het. I2 | Het. P value |
| --- | --- | --- | --- | --- | --- | --- | --- |
| Nausea | Placebo | 1.44 (1.13-1.84) | .003 | 4 | 1441 | 0% | .51 |
| Vomiting | Placebo | 1.42 (1.10-1.84) | .008 | 4 | 1441 | 7% | .36 |
| Diarrhoea | Placebo | 2.73 (1.59-4.68) | .0003 | 4 | 1441 | 68% | .02 |
| Abdominal pain | Placebo | 1.00 (0.75-1.33) | .98 | 4 | 1242 | 0% | .45 |
| Bloating | Placebo | 1.32 (0.73-2.38) | .36 | 1 | 240 | N/A | N/A |
| Constipation | Placebo | 1.11 (0.76-1.63) | .59 | 2 | 797 | 15% | .28 |
| Headache | Placebo | 1.17 (0.82-1.69) | .39 | 2 | 797 | 69% | .07 |

Likelihood of side effects in PCOS and maternal obesity pregnancies treated with metformin

OR= Odds Ratio ± 95% CI. Het=Heterogeneity

**Supplementary Table S7: Gastrointestinal side effects in women with diabetes in pregnancy randomised to metformin.**

| **First Author** |  | **Raw averages (%)** | **N** |
| --- | --- | --- | --- |
| Ainnudin, 2015 | GI side effects | 7 (8) | 93 |
| Stopped medication | 6 (6) | 93 |
| Ashoush, 2016 | GI side effects | 14 (30) | 47 |
| Stopped medication | 0 (0) | 47 |
| Ijas, 2011 | GI side effects | 3 (6) | 50 |
| Stopped medication | 3 (6) | 50 |
| Niromanesh, 2012 | GI side effects | 6 (8) | 80 |
| Stopped medication | 3 (4) | 80 |
| Rowan, 2008 | GI side effects | 32 (9) | 363 |
| Stopped medication | 7 (2) | 363 |
| Spaulonci, 2013 | GI side effects | 21 (46) | 46 |
| Stopped medication | 1 (2) | 46 |
| Tertti, 2013 | GI side effects | 2 (2) | 110 |
| Stopped medication | 2 (2) | 110 |
| Wasim, 2020 | GI side effects | 4 (3) | 137 |
| Stopped medication | 4 (3) | 137 |
| *Weighted average* | *GI side effects* | *12.5* | 929 |
| *Incidence (%)* | *Stopped medication* | *14.3* | 929 |


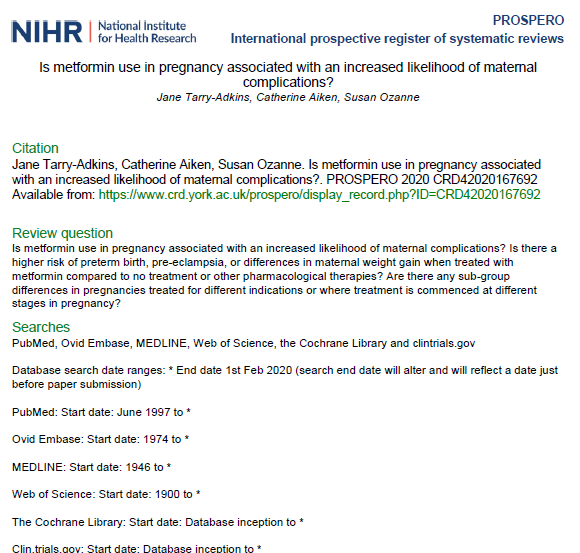

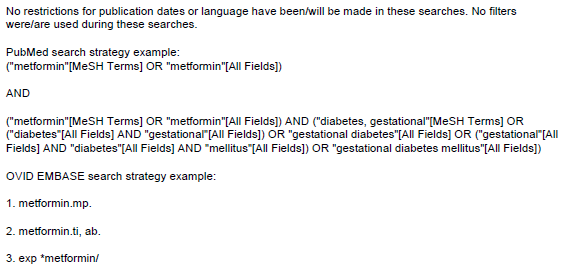


**Supplementary S1 Text**


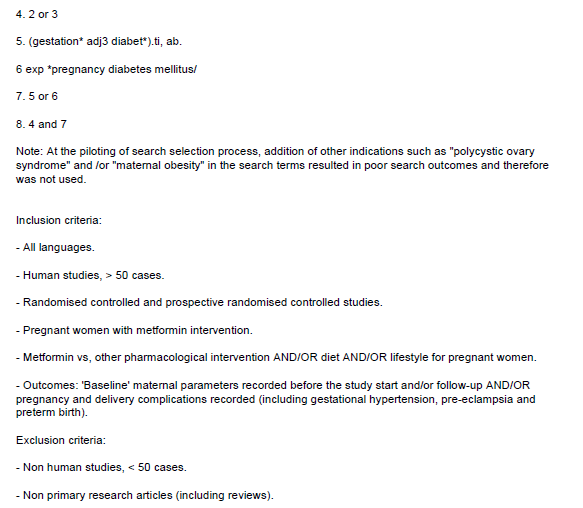

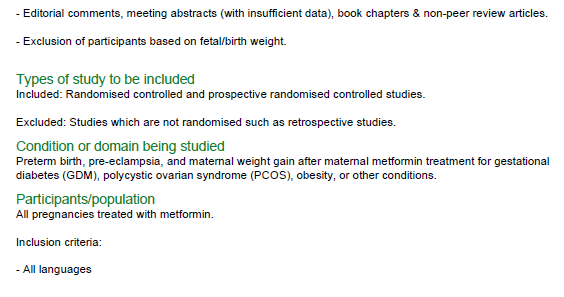


**Supplementary S1 Text (continued)**


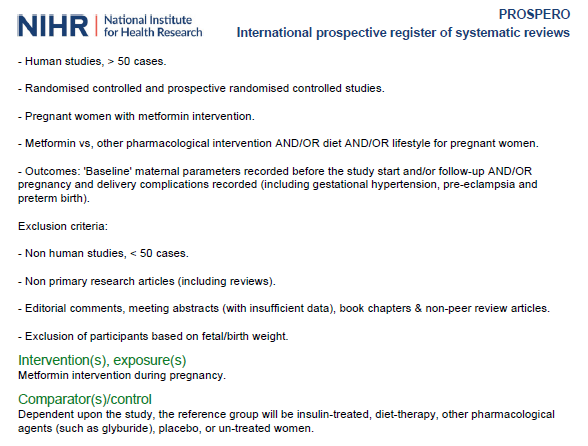

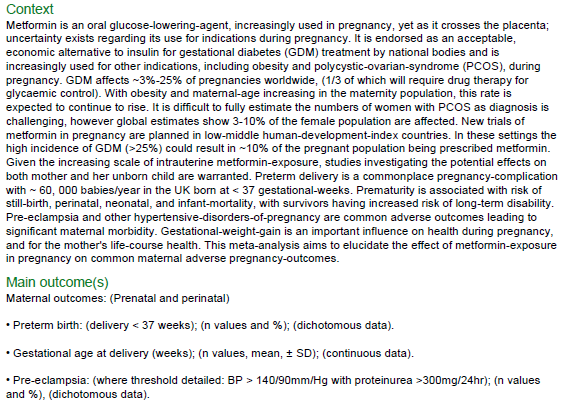


**Supplementary S1 Text (continued)**


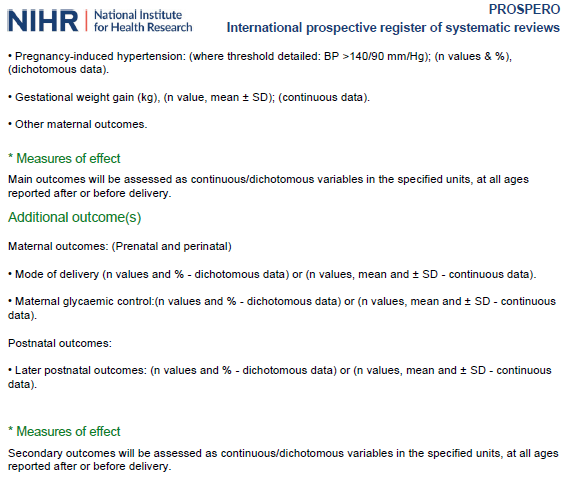

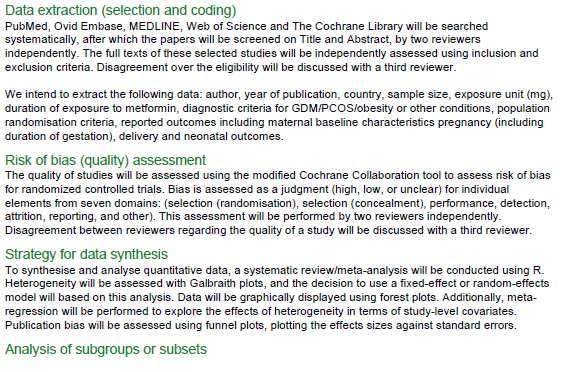

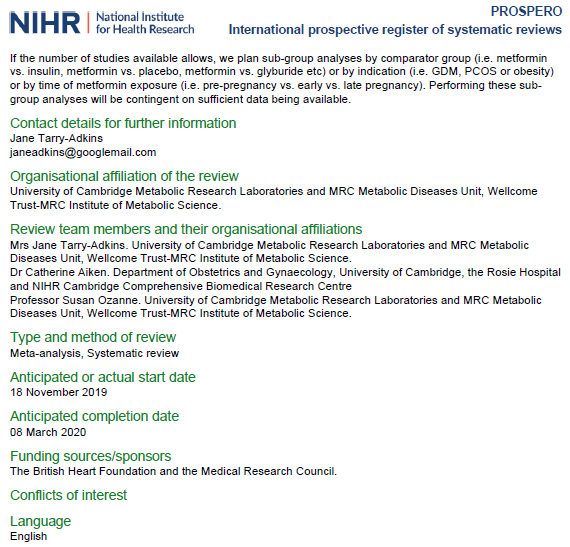

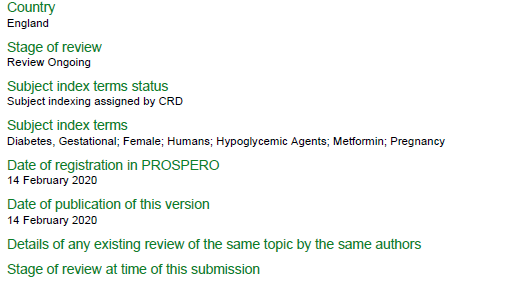


**Supplementary S1 Text (continued)**


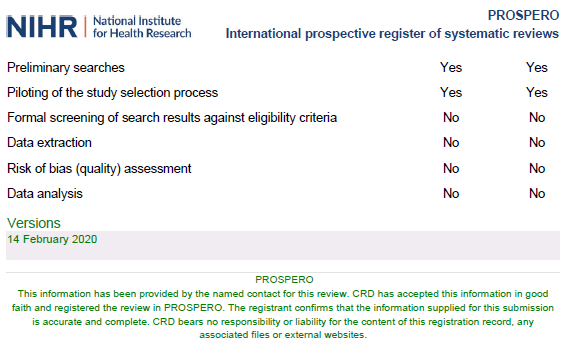


**Supplementary S1 Text (continued)**

**PubMed:**

Initial search date: 19.11.19. (Search date range: June 1997 to 19.11.19).

Basic search terms: Metformin AND Gestational diabetes mellitus

("metformin"[MeSH Terms] OR "metformin"[All Fields]) AND ("diabetes, gestational"[MeSH Terms] OR ("diabetes"[All Fields] AND "gestational"[All Fields]) OR "gestational diabetes"[All Fields] OR ("gestational"[All Fields] AND "diabetes"[All Fields] AND "mellitus"[All Fields]) OR "gestational diabetes mellitus"[All Fields])

**Web of Science:**

Initial search date: 19.11.19. (Search date range: 1900 to 19.11.19).

Basic search terms: Metformin AND Gestational diabetes mellitus

**OVID EMBASE**

Search date range: 1974 to 19.11.19.

metformin.mp.

metformin.ti,ab.

exp*metformin/

2 or 3

(gestation*adj3 diabet*).ti,ab.

exp*pregnancy diabetes mellitus/

5 or 6

4 and 7

**OVID MEDLINE**

Search date range: 1946 to 19.11.19.

metformin.mp.

metformin.ti,ab.

exp*metformin/

2 or 3

(gestation*adj3 diabet*).ti,ab.

4 and 5

**The Cochrane Database**

Search date range: Database inception to 19.11.19.

Basic search terms: Metformin AND Gestational diabetes mellitus

**www.clinical trials.gov**

Search date range: Database inception to 19.11.19.

Basic search terms: Metformin AND gestational diabetes

**Supplementary S2 Text: Database search terms**
