# Supplementary material for: Impact of metformin treatment during pregnancy on maternal outcomes: a systematic review/meta-analysis
Source: Research Square preprint supplement (doi:10.21203/rs.3.rs-112670/v1), 2020-11-30
Supplement: Supplementary file 14 [file b48712c6b5dc9fd9656a338e.xlsx]

## Sheet: Met vs. ins diabetes in preg
Supplementary Table S3: Study characteristics
Metformin vs. insulin (diabetes in pregnancy)
									Population randomisation criteria	Population randomisation criteria
Study no	Manuscript title	Trial Information	Lead author	Population cohort	Trial type	Randomisation details	Characteristics of trial participants	GDM diagnosis criteria	Metformin-treated group	Insulin-treated group	Maternal characteristics (baseline)	Pregnancy outcomes or measures taken at follow-up	Delivery outcomes in (metformin group; unless stated)
1	Metformin versus insulin treatment in gestational diabetes	Pakistan cohort (Karachi)	Ainuddin J	Pakistan	Prospective randomised	"Randomization was done as the eligible patients	n=5050 screened for GDM	GDM diagnosis criteria:	n=93 randomly assigned to metformin (500mg to 2500mg/day). (Mean dosage: 1910mg/day)	n=93 randomly assigned to insulin (0.9U/kg/body wt)	Metformin-treated women were younger at baseline vs. insulin group.	Reduced gestational weight gain (p<0.000) in metformin group and metformin & insulin	N/S gestational age at delivery (metformin vs. insulin, metformin & insulin vs. insulin)
	in pregnancy in a developing country: a randomised control	Trial registration no: NCT 01855763		(SE Asia)	open-label clinical trial.	entered the study with odd number assigned to	n=1510 risk factors for GDM	GCT: >7.8mmol/L then OGTT:	n=12 lost to follow-up and n=6 discontinued treatment.	(24hr dose).	N/S other baseline maternal characteristics	vs.insulin alone.	N/S c-section (metformin vs. insulin, metformin & insulin vs. insulin)
	trial. Diabetes Res. Clin. Pract. 107, 290-299 (2015)					metformin treatment and even number for insulin	GCT: n=457 positive GCT.	75g glucose load OGTT:	n=75 completed the study.	n=13 lost to follow-up and delivered elsewhere, n=6		N/S pre-eclampsia (metformin vs. insulin, metformin & insulin vs. insulin)
						treatment irrespective of body weight and GTT	Positive OGTT n=250. Taken forward	Fasting >5.3 mmol/L, 1hr ≥ 10 mmol/L & 2hr	n=32 (42.7%) metformin treated women required supplemental insulin to achieve appropriate	non-compliance.		N/S pregnancy-induced hypertension
						values at study entry. Blinding was not possible	These women were given lifestyle intervention; if glycemic targets were not attained after 1-2	≥ 8.6 mmol/L.	glycemic control. (Target range: FBS > 5.5mmol/L and RBS ≤7.7mmol/L).	n=74 completed the study.
						because of different routes of administration of	weeks, they were enrolled onto the study. n=200	(ADA; 2015 criteria)	n=43 (57.3%) metformin alone.	Women were enrolled into study approx 10 weeks of
						drugs".	n=14 excluded from study (medical reasons); n=186 randomised to treatment.		No information on time of study entry. Treatment until end of pregnancy.	gestation.
							GDM diagnosis 20 -36 weeks gestation & singleton pregnancies. 20-46 years old.		Supplementary insulin given this approximately 26 weeks gestation.
2	Metformin treatment in type 2 diabetes in pregnancy: an	Pakistan cohort (Karachi)	Ainuddin J	Pakistan	Randomized open labeled	"Randomization was done as the eligible patients	Women with prepregnancy diagnosed type 2 diabetes and cases of newly diagnosed overt diabetes in	GDM diagnosis criteria:	n=125 randomly assigned to metformin (500mg to 2500mg/day). (Mean dosage: Not recorded).	n=125 randomly assigned to insulin (	N/S maternal age	Reduced gestational weight gain (p<0.01) in metformin & insulin and vs. insulin alone.	N/S gestational age at delivery (metformin vs. insulin, metformin & insulin vs. insulin)
	active controlled, parallel-group, randomized, open label study	Trial registration no: NCT 01855763		(SE Asia)	clinical phase III study	enter the study with odd number assigned to	pregnancy.	Fasting: >7.0 mmol/L (126mg/mL), 2hr (RBS)	n=105 (84%) failed glycaemic control and were given insulin supplementation.	(n=20 lost to follow-up; n=5 non-compliant).	Metformin-treated women had reduced parity (vs. metformin & insulin & vs.	Reduced pregnancy-induced hypertension in metformin group (vs. insulin; p=0.02)	N/S c-section (metformin vs. insulin)
	in patients with type 2 diabetes in pregnancy.					metformin treatment and even number for insulin	n=297 women assessed for eligiblity.	> 11.1 mmol/L (200 mg/dL) & HbA1c > 6.5%).	n=105 grouped as metformin & insulin. (n=10 lost to follow-up; n=5 discontinued treatment).	n=100 completed the study.	insulin alone (p<0.05)
	J Diab Res., 2015					treatment irrespective of bodyweight and previous	n=47 excluded (failed inclusion criteria)	(IADPSG criteria).	n=90 completed the study.		N/S FBS, RBS at treatment start
						obstetrical history. Blinding was not possible	n=250 with GDM or pre-existing diabetes taken forward		n=20 grouped as metformin only. (n=4 lost to follow-up). N=16 used for study.		N/S FBS, RBS throughout pregnancy
						because of different routes of administration of drugs"	Women were between 20-48 years of age with singleton pregnancies.		No information on time of study entry. Treatment until end of pregnancy.		BMI (early pregnancy): Metformin alone higher BMI than Insulin alone (p<0.01)
									Treatment duration: Not recorded		BMI (early pregnancy): 28-30kg/m2
3	Feto-maternal outcomes and glycemic control in metformin	Pakistani cohort (Karachi)	Arshad R	Pakistan	Randomised control study.	Study was 'randomised' by allocating metformin	Women considered high risk (bad obstretic history: previous abortions or still births), strong	GDM diagnosis criteria:	n=32 randomly assigned metformin (500mg 3x per day). (Mean dosage: Not recorded).	n=39 randomly assigned to insulin	N/S maternal base-line characteristics except:	Metformin-treated group had reduced HbA1C levels vs. insulin-treated (p=0.03)	Increased preterm birth: (ie more babies born at < 37 weeks and less born at 38 weeks) in metformin
	versus insulin treated gestational diabetics. Pak. J. Med. Sci.,	Trial registration no: No information		(SE Asia)		to the even number participants and insulin to the	family history of GDM, obese patients and patients with a history of GDM in previous pregnancies	WHO criteria	Dose increased where appropriate for glycaemic control.	(Mean dosage: Not recorded)	Increased fasting blood sugar level in insulin treated group (p=0.039).	at term.	vs. insulin (p=0.021)
	33, 1182-1187 (2017).					odd number participants.	were recruited.		n=7 lost to follow-up.	2nd trimester (0.8 units/kg/day)	Increased random blood sugar level in insulin treated group (p<0.001).	No other pregnancy outcomes reported.	N/S c-section
							n=71 (recruited in 2nd trimester of pregnancy)		n=25 completed study.	3rd trimester (0.9 units/kg/day)
									Randomised to treatment in 2nd trimester.	n=14 lost to follow-up.
									Treatment duration: Not recorded	n=25 completed study.
										Randomised to treatment in 2nd trimester.
4	Identification of metformin poor responders, requiring	Egyptian cohort (Ain Shams)	Ashoush S	Egypt	Open label, prospective		n=312 assessed for study eligibility	GDM diagnosis criteria:	n=50 randomly assigned to metformin (initial dose of 1000mg per day to 2500mg per day).	n=50 randomly assigned insulin (starting dose 0.7 units/day/kg)	N/S maternal base-line characteristics including age, BMI, parity, HbA1c, OGTTs	Reduced maternal weight gain (inclusion until delivery) in metformin group (p<0.001)	N/S preterm birth
	supplemental insulin, during randomisation of metformin	(Jan 2014 - Nov 2014)		(N Africa/Middle East)	randomised controlled trial.		n=212 excluded from study	OGTT (75g glucose load):	(Mean dosage: Not recorded)	and increased in 1 unit increments per 10mg glucose higher	(fasting, 1hr, 2hr and 3hr).		N/S C-section rate
	versus insulin for the control of gestational diabetes mellitus	Trial registration no: No information					(n=88; not meeting criteria, n=24 declined to participate	Fasting > 5.3mmol/L, 1hr > 10 mmol/L & 2hr	n=47 received metformin (n=3 withdrew consent).	than the cut off range).	N/S gestational age at GDM diagnosis (average 28 weeks).
	Obstet. Gynecol. Res. 42, 640-647 (2016).						n=100 randomised for exclusion)	> 8.6 mmol/L.	Out of the 47; n=11 received supplementary insulin to achieve appropriate glycemic control (23%)	n=48 received insulin.	N/S gestational age at treatment start (average 30 weeks).
							Women included if had singleton pregnancies and failed to maintain glycemic control after	(ADA; 2015 criteria)	Metformin supplemented with insulin had metformin reduced to 1000mg/day.	n=2 withdrew consent.
							1 week of diet/exercise intervention.		Randomised to treatment at 26-32 gestational weeks.	Randomised to treatment at 26-32 gestational weeks.
									Treatment duration: 74 days	Treatment duration: 69 days
5	Metformin as opposed to insulin in the management of	Egyptian cohort (Tanta)	Borg H	Egypt	Experimental prospective		n=100 women with GDM between 22-36 weeks gestation. Age of women not reported. All	GDM diagnosis criteria: (CC)	n=50 randomly assigned to metformin (500mg -2500mg per day).	n=50 randomly assigned insulin (starting dose 0.7U/kg	N/S maternal baseline characteristics (including age, gravidity, parity, abortion	N/S pre-eclampsia	N/S pre-term birth
	gestational diabetes. Res. Obstet. Gynecol., 2, 17-26 (2016).	(2014-2015)		(N Africa/Middle East)	comparative study.		singleton pregnancies.	OGTT (75g glucose load):	Mean dosage: Not recorded.	body weight/day). Increased as needed.	rates, gestational age at study entry and BMI in early pregnancy and during	N/S gestational hypertension.	N/S C-section rates.
		Trial registration no: No information						Fasting > 95mg/dL (5.2mmol/L), 1hr	n=0 withdrawn from study	Mean dosage: Not recorded.	treatment).	Reduced weight gain during pregnancy in metformin group vs. insulin (p<0.001).	N/S normal vaginal delivery.
								> 180mg/dL (10 mmol/L) & 2hr > 155mg/dL	Gestational age at study entry: 22 to 33 weeks	Gestational age at study entry: 24 to 36 weeks
								(8.6 mmol/L) and 3hr > 146mg/dL ( ). 2 or	Treatment duration: Not recorded	Treatment duration: Not recorded
								more abnormal glucose values was GDM
								diagnosis.
6	Is metformin a viable target to insulin in the treatment of	Egyptian cohort (Alglaa)	Eid S.R	Egypt	Prospective randomized	No details of randomisation protocols given.	n=250 GDM women, aged between 18-42 years and 22-30 weeks gestation.	GDM diagnosis criteria: (ADA)	n=125 randomized to metformin treatment (500mg 1x per day to 2500mg per day)	n=125 randomized to insulin treatment (	N/S baseline maternal characteristics (including age, BMI, gestational	Reduced gestational weight gain in metformin group vs. insulin group (p<0.0001)	N/S preterm birth
	gestational diabetes mellitus (GDM)? Comparison of	Trial registration no: No information		(N Africa/Middle East)	controlled trial.		Treatment started approximately 28 weeks of gestation until delivery.	(75g glucose load) fasting; >5.3mmol/L, 1hr ≥	Study exclusions (total n=12)	Study exclusions (total n=9)	age at study start, parity, FBS, 2hr post-prandial blood glucose and HbA1c).	Lower BMI in metformin group vs. insulin group (p=0.05)	N/S pre-eclampsia
	maternal and neonatal outcomes. Egyp. Pediatr. Assoc.	(Mar 2016- June 2017)					Singleton pregnancies.	10mmol/L, 2hr ≥ 8.6 mmol/L or 3hr ≥ 7.8	n=2 (failed glycemic control with metformin and were	n=4 failed to follow-up, n=5 delivered elsewhere)			N/S pregnancy-induced hypertension
	Gaz. 66, 15-21, (2018).							mmol/L. Two or more abnormal values =	supplemented with insulin, n=3 failed to follow-up and n=7 delivered elsewhere.	n=116 completed the study
									n=113 completed the study.	Treatment duration: 28 weeks gestation until delivery.
									Women who required supplementary insulin were excluded from the study
									Treatment duration: 28 weeks gestation until delivery.
7	Metformin vs. insulin treatment for gestational	Egyptian cohort (New Damietta)	Galal M	Diametta, Egypt	Comparative prospective	Patients were randomised	n=106 GDM women between 28 to 34 weeks gestation	GDM diagnosis criteria: (ADA)	n=56 randomly assigned to metformin treatment (500mg to 2500mg per day).	n=50 randomly assigned to insulin treatment	N/S baseline maternal characteristics (including age, BMI, gravidity,	Reduced gestational weight gain in metformin vs. insulin (p=0.024).	Increased preterm labour in metformin vs. insulin (p=0.056)
	diabetes mellitus: A randomised controlled study.	Trial registration no: No information		(N Africa/Middle East)	randomised study.	by electronic means.	Singleton pregnancies.	(75g glucose load) fasting; ≥ 5.1mmol/L or	n=56 completed the study	(0.8 unit/kg/day).	parity, gestational age at inclusion, liver & kidney function &	N/S pregnancy-induced hypertension	Reduced c-section rate in metformn vs. insulin (p=0.031)
	Res J Obstet Gynecol, 12: 23-27.	Ethical no: ADIM-IRB23032019				No other details given.	Pre-gestational diabetes excluded	1hr ≥ 10mmol/L or 2hr > 8.5 mmol/L.	Gestational age at study entry: not recorded	n=50 completed the study.	proteinurea incidence.
									Treatment duration: Not recorded	Gestational age at study entry: not recorded
										Treatment duration: Not recorded
8	The efficacy of metformin compared with insulin in regulating	Iranian cohort (Masshad)	Ghomian N	Iran	Randomised clinical trial	"Using a random number table, study participants	n=390 assessed for eligibility	GDM diagnosis criteria: (ADA)	n=193 randomly allocated metformin.	n=153 randomly allocated insulin.	N/S all maternal base-line characteristics	No pregnancy outcomes measured	N/S preterm
	blood glucose levels during gestational diabetes mellitus: A	Trial registration no:		(N Africa/Middle East)		were allocated to two groups (each comprising 143	Inclusion:	(75g glucose load): Fasting; ≥ 5.1mmol/L or	(n=20 withdrew consent; n=30 ( discontinued intervention (changed to insulin). (15.5%)	n=10 withdrew consent
	randomised clinical trial. J. Cell Physiol., 1-7 (2018).	IRCT2016080229172N1				pregnant women)."	Failure to achieve glycemic control with diet & exercise (target: FPG; <95mg/dL, 2hr < 120mg/dL).	1hr ≥ 10mmol/L or 2hr 8.5mmol/L.	n=143 analysed.	n=143 analysed
							n=44 excluded from study.		Treatment started: 24-28 gestational weeks until end of pregnancy.	(Treatment started 24-28 gestational weeks)
							(n=32 not meeting inclusion criteria, n=12 declined to participate).		Metformin dose: 500mg - 1500mg per day.	Insulin dose: 0.1IU/kg body weight
							n=346 randomised for study.		Women who required supplementary insulin were excluded from the study
9	Metformin prevents macrosomia and neonatal morbidity	Pakistan (Lyari)	Hassan J.A	Pakistan	Randomized clinical trial	"Randomization was done as first patient of insulin	n=150	GDM diagnosis criteria: (WHO)	n=75 randomly assigned to metformin treatment (500mg - 3000mg daily).	n=75 randomly assigned to insulin treatment	N/S BMI, age or parity of any women at study start.	Reduced gestational weight gain in metformin group vs. insulin group (p=0.001)	N/S gestational age
	in gestational diabetes. Pak. J. Med. Sci. 28, 384-389	Trial registration no: No information		(SE Asia)		and 2nd patient on Metformin irrespective of body	All subjects were treated at 29 weeks gestation	(50g glucose load GCT initial screen:	n=18 (24%) of metformin group required insulin supplementation to control glycemia. These				Reduced C-section rates (p=0.004) in metformin
	2012					weight and GTT blood glucose values at study entry."	GDM diagnosis criteria: (50g glucose load GCT initial screen: ≥ 140mg/dL glucose (7.8mmol/L)	≥ 140mg/dL glucose (7.8mmol/L), then	women were obese (>BMI) and had raised blood glucose upon study entry.
							Then (75g glucose load OGTT; fasting: > 95mg/dl (5.3mmol/L), 1hr ≥ 180mg/dL (10mmol/L) or	(75g glucose load OGTT; fasting: > 95mg/dl
							2hr ≥ 180mg/dI (8.6mmol/L). 2 out of 3 values exceeded for GDM.	(5.3mmol/L), 1hr ≥ 180mg/dL (10mmol/L) or
							Singleton pregnancies between 20-36 gw. Aged between 18 - 45 years of age.	2hr ≥ 180mg/dI (8.6mmol/L). 2 abnormal
10	The role of adding metformin in insulin-resistant diabetic	Egypt (Ain Shams)	Ibrahim	Egypt	Non-inferiority randomized	"Randomization was performed using a computer-	n=90 women with GDM or diabetes in pregnancy randomised to metformin or 'control' (insulin).	No information provided	n=46 randomly assigned to metformin (1500mg to 2000mg per day)	n=44 randomised to 'control' (had insulin dose increased).	No baseline maternal characteristics reported in paper.		N/S gestational age
	pregnant women: a randomized controlled trial	Trial registration no: NCT01915550		(N Africa/Middle East)	clinical trial	generated randomization system. To minimize the	between 20-34 weeks gestation who showed insulin resistance (defined as poor glycemic control at			Increasing insulin dose until glycaemic control was met			N/S C-section rates
						risk of selection bias, the allocation table was checked	a daily dose of insulin 1.12 units/kg)			(0.61–1.28 units/kg per day).
						after applying eligibility criteria on recruited women.
						Women who chose to switch from the allocated group
						to the other one were canceled and not included in
						the final statistical analysis.
						Per-protocol treat-ment analysis was performed".
11	Metformin should be considered in the treatment of	Finnish cohort (Oulu) (2005-2009)	Ijas H	Finland	Open label prospective	"Randomisation was achieved using opaque	n=100	GDM diagnosis criteria:	n=239 assessed for eligibility.	n=50 randomly assigned to insulin.	N/S all maternal baseline characteristics	No pregnancy outcomes measured	Metformin women delivered earlier than insulin women but this was N/S (p=0.153)
	gestational diabetes: a prospective randomised study.	Trial registration no:		(Europe)	randomised trial.	numbered sealed envelopes containing a	Singleton pregnancies diagnosed with GDM between 12 - 34 weeks gestation.	2hr OGTT (75g glucose load); (after overnight	n=139 excluded	(Dosed according to hospital guidelines...)	(Including age, parity, nulliparous, BMI at study entry, fasting and 2hr glucose		N/S gestational age
	BJOG 118, 880-885 (2010)	NCT01087866				randomisation code generated manually in blocks		fast)	n=101 of these did not meet inclusion criteria (below is this breakdown):		(OGTT) and gestational age at randomisation).		Increased C-section (p=0.047) in metformin
						of ten (H.I.)"		Fasting: ≥ 5.3mmol/L, 1hr ≥ 11mol/L , 2hr	n=23 treatment started <12wk gestation or >34 weeks of gestation (n=36)
								> 9.6mmol/L.	n=12 essential hypertension, n=6 abnormal pre-pregnancy glucose tolerance
								1 or more abnormal; GDM diagnosis.	n=8 chronic disease, n=5 twin pregnancy, n=3 language barrier,
								(Unclear which criteria used).	n=6 previous pregnancy, n=2 IUGR.
									In addition; n=28 refused to participate.
									n=100 remaining participants.
									n=50 randomly assigned to metformin
									Doses: (750mg 1x day (wk1), wk2 (2x day), wk 3 onwards (3x day).
									n=2 withdrew consent; n=1 had evalated liver enzyme levels. .
									n=47 metformin group completed study.
									In metformin group, n=15 (32%) required insulin for adequate glycemic control. These were more
									obese (p=0.002), had higher FPG (p=0.001) & had GDM intervention earlier (p=0.001) vs. metformin
12	Comparison of metformin with insulin in the management	Indian cohort (Lahore) (2016-2017)	Khan R.M.A	India	Randomised controlled trial	"Sample was calculated using non probability	n=770	GDM diagnosis criteria: (CC)	n=385 for metformin-treated group.	n=385 for insulin-treated group.	Women treated with metformin were younger (p=0.000), were at a younger	Reduced incidence of pre-eclampsia in metformin vs. insulin (p=0.000)	Reduced preterm delivery in metformin vs. insulin (p=0.000)
	of gestational diabetes. Med. Forum 28, 105-108 (2017).	Trial registration no: No information				consecutive sampling technique, using the reference		Fasting > 95 mg\dl (5.3mmol/L), 1hr >	Doses: 500mg per day, increasing by 500mg per week as required. (Maximum dose?)	Doses:	gestational age at study entry (p=0.000), and had reduced BMI (p=0.000)		However, the metformin-treated women, by-on-large, were much healthier at base-line vs. insulin-treated
						study by Hesham Borg et al". (REF 5 in this table)		180mg\dL (10mmol/L), 2hr >155mg\dl			compared to insulin treated women.		women (Insulin women were older with increased BMI).
								(8.6mmol/L), 3hr >146mg\dL (8.1mmol/L).			FBS increased at study entry (p=0.000) and after treatment (p=0.000) in
											metformin vs. insulin-treated group.
											HbA1c decreased at study entry (p=0.000) and after treatment (p=0.000) in
											metformin vs. insulin treated group.
13	Comparison of newborn outcomes in women	Iranian cohort (Isfahan)	Mesdaghinia E	Iran	Prospective blinded randomized	"Randomization was generated by a third party	GDM aged 18 - 45 years with a singleton pregnancy, without prior diabetes history	GDM diagnosis criteria: (ACOG)	n=100 randomly assigned metformin (500mg to 2500mg per day)	N=200 randomly assigned to insulin (dose not mentioned	N/S maternal age	No pregnancy outcomes measured	Decreased preterm birth in metformin (vs. insulin) (p=0.007)
	with gestational diabetes mellitus treated	Trial registration no: IRCT201104162699N5			clinical parallel group trial	physician using tables of random numbers. Care	n=43 exclusions from study (n=22 not meeting inclusion criteria; n=17; declined to participate; n=4)	Fasting: >95mg/dL, 1hr >180mg/dL, 2hr	n=22 required supplemetary insulin to acheive glycemic control (22%)	in paper).	N/S BMI (at pregnancy start)
	with metformin or insulin. A randomized					providers and physician assessing outcomes were	n=243 assessed for eligibility	>115mg/dL, 3hr >140mg/dL blood sugar.	These were excluded from study and replaced with women who didn't require insulin		N/S HbA1c (at study start)
	blinded trial. Int. J. Prev. Med. 4, 327-333,					blinded in this study".	n=43 exclusions from study (n=22 not meeting inclusion criteria; n=17; declined to participate; n=4)	2 out 4 abnormal readings; GDM diagnosis.	n=100		N/S gestational age at study entry
	2013						other reasons).				N/S familiaral history of GDM
							n=200 randomised for study
14	Moore L.E et al (2007)	Mexican cohort (Alberquerque)	Moore LE	Mexico	Randomized clinical trial	"The subjects were assigned to receive either	Women with GDM: n=63	GDM diagnosis criteria: (ACOG & NDDG)	n=63 women with GDM used in study.	n=31 randomly assigned to insulin.	N/S maternal base-line characteristics between treatment groups.	No pregnancy outcomes measured	N/S gestational age at delivery.
	Metformin and insulin in the management of	Trial registration no:				insulin or metformin by sequentially labeled opaque	Women were screened between 24-30 weeks gestation. No mention of whether just singleton pregnancies	50g glucose load GCT: 1hr ≥ 140mg/dL (7.8mmol/L)	n=32 randomly assigned to metformin.	Insulin dose (0.7U/kg body wt/2 x day) to			N/S c-section rates
	gestational diabetes mellitus: preliminary					sealed envelopes that were arranged by a computer	were used in the trial.	went on to a 3hr OGTT.	(1000mg - 2000mg per day).	maintain euglycemia (fasting 60-90mg/dL, 2hr
	results of a comparison. J. Reprod. Med					generated list. After informed consent was obtained		Fasting > 105mg/dL (5.8mmol/L) , 1hr >190mg/dL	Number of women who took maximal dose of metformin yet failed to attain glucose	<120mg/dL).
						by the physician, the next envelope was selected by		(10.6mmol/L ), 2hr > 165mg/dL (9.2mmol/L) or 3hr	control and put onto insulin (no numbers recorded).
						the research nurse not involved with patient care to		> 145mg/dL (8.1mmol/L).
						indicate group designation".		Abnormal levels of 2 or more was considered GDM
								diagnosis.
15	Metformin compared with insulin in the management of	Iranian cohort (Tehran)	Niromanesh S	Iran	Randomized clinical trial	"Women with GDM inadequately controlled by diet	Women with GDM n=214	GDM diagnosis criteria: (CC)	n=42 of these were excluded: (n=33 due to not meeting inclusion criteria and n=9 withdrew consent).	n=86 for insulin-treated group	N/S maternal base-line characteristics between treatment groups.	Decreased gestational weight gain in the metformin-treated group (p<0.001)	Preterm birth rate higher (p=0.148) in metformin-treated group
	diabetes mellitus: A randomized clinical trial. Diab. Res.	Trial registration no: No information			(Single blind).	were assigned randomly to receive either metformin	Singleton pregnancies diagnosed with GDM between 20 - 34 weeks gestation.	50g GCT. >130mg/dL glucose (1hr), then	n=172 randomized to treatment.	n=6 lost to follow-up	No changes in glycemia between groups	Reduced weight gain after study entry in the metformin-treated group (p<0.001)	N/S gestational age
	Clin. Prac. 98, 422-429 (2012).	Human research review no:				(n=86) or insulin (n=86) by sequentially labeled,	Women aged between 18 - 40 years.	OGTT (100g glucose load):	n=86 metformin treatment (n=1 withdrew consent, n=2 lost to follow-up and n=3 discontinued	n=80 for insulin group		N/S pre-eclampsia	N/S overall C-section rate
		89/130/2025				opaque sealed envelopes that were generated by a		Fasting > 105mg/dL (5.8mmol/L), 1hr >	metformin due to GI side-effects)	Insulin dose: 0.2IU/kg body weight (initial dose).		N/S pregnancy-induced hypertension	N/S emergency C-section rate
						computer-generated random list, using as parameters		190mg/dL (10.6 mmol/L), 2hr > 165 mg/dL	Metformin dose was 1000 to 2500mg per day.
						a two-arm study with equal numbers of participants		(9.2 mmol/L) & 3hr > 145 mg/dL (8.1 mmol/L)	Left n=80. Out of this n=80, 11 women (14%) required insulin supplementation to
						in each arm by a person not-related to the study."		2 or more abnormal readings - GDM	ensure adequate glycemic control.
16	Metformin versus insulin for the treatment of gestational	Australian/New Zealand cohorts	Rowan JA	Australia and New Zealand	Randomised controlled trial	"Randomization was performed with a block size of	Women with GDM n=751	GDM diagnosis criteria: (ADIPS)	n=373 randomly assigned metformin (500mg 1x or 2x daily up to 2500mg daily).	n=378 randomised to insulin	N/S all maternal baseline characteristics except:	Decreased gestational weight gain between enrollment to postpartum visit in	p=0.04 increased preterm birth in metformin group
	diabetes. N. Engl. J. Med. 358, 2003-2015 (2008).	Trial registration no:				four and was stratified according to site and	Women were randomised to their treatment groups between 22-33 weeks of gestation.	FBS: > 5.4 mmol/L or 2hr 6.7 mmol/L (post-	n=10 excluded from study (n=5 withdrew consent; n=1 moved away; n=4 violated protocol	n=8 excluded	More (p<0.01) pregnancy terminations or miscarriages in metformin-treated	metformin treated group (p=0.006)	N/S iatrogenic preterm birth
		ACTRN12605000311651				gestational age (from 20 weeks to 27 weeks 6 days,	Singleton pregnancies.	prandial).	n=363 randomised to metformin.	n=2 withdrew consent,	group.	N/S pre-eclampsia	p=0.07 increased spontaneous birth in metformin vs. insulin.
						or from 28 weeks to 33 weeks 6 days)."	Women aged between 18 - 45 years.		n=66 (20-27 weeks of gestation). n=297 (28-33 weeks of gestation).	n=2 moved away;		N/S gestational hypertension
									n=195 (54%) given metformin alone.	n=4 had protocol violation)		N/S BMI
									n=9 stopped metformin before delivery (n=5 violated protocol, n=2 withdrew consent	Completed the study (n= 370)
									n=2 other reasons.	n= 67 (20-27 weeks of gestation).
									n=186 final number for metformin only.	n=303 (28-33 weeks of gestation)
									n=168 (46%) given metformin plus insulin for appropriate glycemic control.	(n=4 stopped insulin before delivery)
									n=18 stopped metformin plus insulin before delivery.	Out of the 4; n=3 withdrew consent;
									Metformin treatment was stopped in 7.4% of all subjects before delivery.	n=1 had another reason.
									Reasons for stopping metformin: n=9 obstetric complications, n=1 sepsis,
									n=1 declining liver function, n=7 adverse GI effects, n=5 chose to stop,
									n=4 advised to stop.
									n=32 (8.8%) had metformin doses reduced to prevent GI effects (to 1000mg/day)
17	Could metformin manage gestational diabetes instead of	Egyptian cohort (Zagazig)	Saleh HS	Egypt	Prospective randomized	"They were divided randomly into two groups by	n=150 assessed for study eligibility.	GDM diagnosis criteria: (WHO)	n=75 assigned to receive metformin (8 were excluded, these being: 4 withdrawal of consent,	n=75 randomly assigned insulin	N/S maternal base-line characteristics.	N/S pre-eclampsia	Increased pre-term birth incidence (p=0.039) (metformin vs. insulin)
	insulin? Int. J. Reprod. Med. (2016).	Nov 2012-Dec 2014			comparative study	permuted block randomization".	Inclusion criteria: Women diagnosed with GDM who did not respond to diet intervention after	OGTT (75g glucose load): Fasting ≥ 7mmol/L,	2 lost to follow-up, 2 discontinued medication)	n=5 excluded (n=3 withdrew consent and n=2 lost to	N/S fasting blood sugar or mean 2hr post-prandial blood sugar at study start	N/S polyhydramnios	N/S C-section rate
		Trial registration no: No information					3 weeks. GDM diagnosed between 26-34 gestational weeks. Age? Singleton pregnancy?	or 2hr ≥ 7.8mmol/L	n=67 completed the study	follow-up).	and through treatment.	N/S rates of UTI
							Pre-pregnancy diabetes, previous insulin treatment, metformin intolerance, liver or kidney		Metformin dose: 500mg -3000mg per day.	n=70 completed the study		N/S FPG and 2hr post-prandial glucose levels at study start & throughout treatment
							disease, or obstetric high risk complications were excluded. (Exclusions same as above).			Insulin dose: 1st trimester (0.7U/kg body wt/24hr;
										2nd trimester -20-32 wks, 0.8 U/kg/day : 32-36 wks,
										0.9U/kg body wt/24hr, 36wks onwards: 1U/kg body wt/
										24hr.
18	Treatment of gestational diabetes mellitus: insulin or	Indian cohort (Kolkata)	Somani P.S	India	Randomized clinical trial	"The trial was a randomised 1:1 parallel group open	n=723 initial GDM screen	GDM diagnosis criteria: (WHO)	n=38 randomly assigned to metformin treatment	n=38 randomly assigned to insulin treatment	N/S in any maternal characteristics at baseline including age, BMI, GDM history,	N/S gestational weight gain	N/S gestational age
	diabetes mellitus: insulin or metformin? J. Evol. Med. Dent.	Trial registration no: CT RI/2014/08/004835			Study personnel not blinded to	labelled single centre active controlled study".	n=119 Women with GDM between 18-35 years, with singleton pregnancies, screened between	OGTT (75g glucose load): Fasting ≥ 7mmol/L,	(500mg to 2000mg per day)	(4-42 IU)	gravity, OGTTs (fasting, 1hr, 2hr), gestational age at randomisation and HbA1c.	N/S pre-eclampsia	N/S C-section rate
	Sci., 5, 4423-4429 (2016).				intervention allocation.		24-34 weeks of gestation.	or 2hr ≥ 7.8mmol/L	n=3 withdrew consent, n=2 lost to follow-up & n=1	n=2 withdrew consent, n=1 lost to follow-up &	All baseline data was collected before randomisation code was broken. This	N/S pregnancy-induced hypertension
							After exclusion taken into account, n=76 randomized for study		violated protocol.	n=2 violated protocol.	study (and all others) treatments could not be blinded to participants and
							Women with pre-pregnancy diabetes excluded.		n=32 completed study.	n=33 completed study.	study personnel and investigators due to the differenty methods of delivery.
									Women who did not achieve appropriate glycemic control were supplemented with insulin (n=8)
									(25%).
19	Randomized trial or metformin vs insulin in the management	Brazilian cohort (Sao Paulo)	Spaulonci C.P	Brazil	Randomized clinical trial	"Patients who met all inclusion criteria were	n=94	GDM diagnosis criteria: (ADA)	N=47 randomised to metformin (N=1 excluded from study) (N=46)	n=46 for insulin-treated group (started at 0.4units/kg	Women placed on insulin treatment had more pregnancies than those	Decreased gestational weight gain in metformin (p=0.002)	N/S gestational age
	of gestational diabetes. Am. J. Obstet.Gynecol. 209, e1-e7	(2007-2010)				randomized to receive either metformin (study	Singleton pregnancies	(75g or 100g glucose load); Fasting >	N=1 excluded from study.	body weight/day)	placed onto metformin (p=0.032)	N/S pre-eclampsia	N/S pre-term birth
	2013	Trial registration no:UMIN 000005393				group) or insulin (control group) according to an	Women were subjected to diet & exercise > 1 week without satisfactory glycemic control to be eligible for	95 mg/dL (5.3mmol/L), 1hr > 180 mg/dL	N=46 analysed.		Women in the insulin (± metformin) group were diagnosed with GDM earlier
						electronic randomization list".	treatment and study.	(10 mmol/L), 2hr > 155mg/dL (8.6 mmol/L)	n=14 achieved adequate glycemic control on 850mg 2 x day		in pregnancy compared to those women treated with metformin (p=0.03).
								& 3hr > 140 mg/dL (7.8 mmol/L)	n=32 did not achieve glycaemic control and were put on 850mg		All other maternal characteristics were N/S
								2 or more abnormal readings - GDM	metformin 3 x day.
									Out of the n=46 metformin-treated women; n=12 were supplemented
									with insulin (26%) to achieve appropriate glycemic control.
20	Metformin vs. insulin in gestational diabetes. A randomized	Finnish cohort (Turku) (2003-2006)	Tertti K	Finland	Randomised controlled trial	"… were randomized by sealed envelopes to	n=90 GDM diagnosed women	GDM diagnosis criteria: (FNC)	N=111 randomised to metformin	Insulin-treated (n=110)	N/S Maternal age	N/S gestational weight gain	N/S preterm birth
	study characterizing metformin patients needing additional	Trial registration no: NCT01240785				metformin (n=111) or insulin (n=110)	Women matched for age and BMI.	2hr OGTT (75g glucose load): fasting ≥	N=1 excluded from study (moved away). N=107 analysed	n=3 removed due to protocol violation	N/S parity	N/S pre-eclampsia
	insulin. Diab Obes Metab 15, 246-251 (2013)						Singleton pregnancies.	4.8mmol/L, 1hr ≥ 10mmol/L & 2hr ≥ 8.7mmol/L.	Doses: (500mg 1 x day to 750mg 2 x day)	n=107 analysed	N/S maternal BMI	N/S pregnancy-induced hypertension
							2hr OGTT measurements made between 11-32 weeks of gestation.	At least 2 abnormal readings - GDM	Both groups were matched for pre-pregnancy BMI and age.		N/S glycaemic control
									If glycemic control was not met (FPG > 7mmol/L and/or post-prandial glucose > 10mmol/L),		N/S smoking status
									metformin was supplemented with insulin. N=		N/S gestational age at randomization
21	Comparison of Metformin and Insulin for Management of	Pakistani cohort (Lahore)	Wassim T	Pakistan	Randomised controlled trial	"The enrolled patients were randomised by the	N=343 women were assessed for the study	GDM diagnosis criteria:	N=137 randomised to metformin (1000-2500mg per day)	N=141 randomised to insulin	N/S Maternal age	N/S pre-eclampsia	N/S preterm birth
	Gestational Diabetes Mellitus: A Randomized Control Trial.	Trial registration no: Not provided				lottery method"	N=312 met inclusion criteria	IADPSG	N=34 (24%) failed metformin treatment and were supplemented with insulin		N/S parity		N/S gestational age
		Ethical approval no: IRB/2015/211/SIMS					N=304 agreed to participate				N/S educational status		N/S C-section rate
							N=278 women with GDM included in analysis (no reasons given for reduction in numbers)				N/S glucose homeostasis
							Between 22-34 weeks gestation, singleton pregnancies.				Increased familial history of GDM in metformin group

## Sheet: Met vs. gly diabetes in preg
Supplementary Table S3: Study characteristics
Metformin vs. glyburide (diabetes in pregnancy)
									Population randomisation criteria	Population randomisation criteria
Study no	Manuscript title	Trial Information	Lead author	Population cohort	Trial type	Randomisation details	Characteristics of trial participants	GDM diagnosis criteria	Metformin-treated group	Glyburide-treated group	Maternal characteristics (baseline)	Pregnancy outcomes or measures taken at follow-up	Delivery outcomes in (metformin group; unless stated)
1	Comparison of neonatal outcomes in women with gestational	Indian cohort (Vellore)	George A	India	Randomised controlled trial	"Randomisation to either the metformin	n=470 women with GDM were assessed	GDM diagnosis criteria	N=79 randomised to metformin	N=80 randomised to glyburide	N/S maternal age	N/S pregnancy-induced hypertension	N/S c-section rate
	diabetes with moderate hyperglycaemia on metformin or	Trial registration no: CTRI/2014/02/00441				or glibenclamide group was done using	for eligibility.	RBS ≥5.5 mmol/l, and ≤7.2	(	N=6 did not receive intervention	N/S maternal education status	N/S preterm birth
	glibenclamide-a randomised controlled trial					sequentially labelled opaque sealed	(n=311 not randomised; did not meet	mmol/l, or a 2-h postprandial	N=4 did not receive intervention	N=74 allocated intervention	N/S family history of DM
	Aust N Z J Obstet Gynaecol, 55, 47-52 (2015)					envelopes that were arranged by a	inclusion criteria, declined to participate,	sugar value ≥6.7 mmol/l, and	(N=3 delivered elsewhere; n=1 withdrew)	N=2 needed switching to insulin	N/S FBS, RBS
						computer generated random list in a	attending obstetrician declined the	≤ 13.9 mmol/l.	N=75 allocated intervention		N/S maternal BMI
						central research office by research officers	participation).	Criteria: NDDG	N=0 needed switching to insulin
						not involved in patient care.	n=159 randomised to treatment		N=79 analysed
							GDM diagnosis: 24-28 weeks gestation
2	Metformin compared with glyburide in gestational diabetes:	Mexican cohort (Alberquerque)	Moore LE	Mexico	Randomised controlled trial	"Women were assigned to receive either	n=149 women with GDM were assessed	GDM diagnosis criteria	N=75 randomised to metformin	N=49 randomised to glyburide	N/S maternal age	N/S gestational age at delivery	Increased c-section rate in metformin
	A randomized controlled trial. Obstet Gynecol, 115, 55-59	Trial registration no: CT00965991				metformin or glyburide by sequentially	for eligibility.	Carpenter-Coustan	(500mg-2000mg/day)	(5mg-20mg/day)	N/S maternal BMI	N/S pre-eclampsia
	2010					labeled, opaque sealed envelopes that			N=5 had insufficient prenatal visits	N=3 did not take medication	N/S maternal weight
						were arranged by a computer-generated			N=1 did not tolerate medicine	N=3 relocated before delivery	N/S gestational age at entry
						random list using as parameters two arm			All randomised patients were included	All randomised patients were included	N/S ethinicity
						study with equal numbers in each arm".			in analysis	in analysis
3	Glyburide versus metformin and their combination for the	Israeli cohort (Haifa)	Nachum Z	Israel	Open-label parellel-group	" Assignment to treatment groups was	n=111 women with GDM assessed for	GDM diagnosis criteria	N=51 randomised to metformin	N=53 randomised to glyburide	N/S maternal age	N/S gestational weight gain	N/S c-section rate
	treatment of gestational diabetes mellitus: A randomized	Trial registration no: NCT01563120			randomized controlled	performed by using a computer	eligibility.	Carpenter-Coustan or	(850-2550mg/day)	(2.5-20mg/day)	N/S parity	N/S gestational age at delivery
	controlled study. Diabetes Care, 40, 332-337 (2017)				trial	randomization sequence generation	n=3 refused to participate	NDDG	Treatment success (n=36; 71%)	Treatment success (n=35; 66%)	N/S maternal weight	N/S preterm birth
						program; the randomization results	n=108 randomised		Treatment failure (n=15) given glyburide	Treatment failure (n=14) given metformin	N/S maternal height	N/S preeclampsia/pregnancy-induced hypertension
						were sealed in opaque envelopes and			N=2 (4% of total) failed both treatments	N=9 (17% of total) failed both treatments	N/S pre-pregnancy BMI
						kept in the maternal and fetal medicine			& given insulin	& given insulin	N/S GDM
						clinic in a closed study box. The sequence
						was concealed until intervention was	GDM diagnosis: 13-33 weeks gestation
						assigned."	Between 18-45 years of age
4	Metformin compared with glyburide for the management of	Brazilian cohort (Sao Paulo)	Silva JC	Brazil	Randomised controlled trial	"The participants were assigned to the	n=347 women with GDM were assessed	GDM diagnosis criteria	N=39 randomised to metformin	N=40 randomised to glyburide	N/S maternal age	Decreased gestational weight gain in metformin (p=0.02)	N/S c-section rate
	gestational diabetes. Int J Obstet Gynecol, 111, 37-40 (2010)	Trial registration no: No information				glyburide or metformin group according	eligibility	WHO	(500-2500mg/day)	(2.5-20mg/day)	N/S parity
						to a computer-generated randomization	n=81 met inclusion criteria and were		N=7 dropped out	N=0 dropped out	N/S pre-pregnancy BMI
						schedule (the name of one of the	randomised to treatment		N=32 analysed	N=40 analysed
						medications was sealed in each	GDM diagnosis: 11 to 33 weeks gestation
						sequentially numbered brown envelope)".	Singleton pregnancies and over 18 years
							of age.
5	Perinatal impact of the use of metformin and glyburide for the	Brazilian cohort (Sao Paulo)	Silva JC	Brazil	Randomised controlled trial	"Computer-generated randomization	n=200 women with GDM were assessed	GDM diagnosis criteria	N=104 randomised to metformin	N=96 randomised to glyburide	N/S maternal age	N/S preterm birth (32-36 gestational weeks)	N/S c-section rate
	treatment of gestational diabetes mellitus. Perinat Med	Trial registration no: No information				provided a sequential numerical list, and	for eligibility	WHO	(n=1 excluded due to IU death)	(n=1 excluded due to IU death)	N/S gestational age at inclusion	N/S gestational age at delivery
	40, 225-228 (2012)					the numbers were placed in brown			N=103 analysed	N=95 analysed	N/S maternal BMI
						envelopes with the name of the group,					N/S maternal weight
						either glyburide or metformin".

## Sheet: Met vs, placebo PCOS
Supplementary Table S3: Study characteristics
Metformin vs. placebo (PCOS)
									Population randomisation criteria	Population randomisation criteria				Delivery & neonatal outcomes in	Offspring outcomes (in metformin group; unless stated)
Study no	Manuscript title	Trial Information	Lead author	Population cohort	Trial type	Randomisation details	Characteristics of trial participants	PCOS diagnosis criteria	Metformin-treated group	placebo-treated group	Follow-up numbers & study details	Maternal characteristics (baseline)	Pregnancy outcomes or measures taken at follow-up	(metformin group; unless stated)	unless stated) (Follow-up studies)	Notes
1	Evaluation of the effect of metformin and aspirin on	Iranian cohort (Tehran)	Jamal A	Iran	Randomized controlled clinical trial.	"Patients were randomly assigned into three groups of 35 patients by	Inclusion criteria:	PCOS diagnosis criteria:	N=35 PCOS women were randomised to metformin (2000mg	N=35 PCOS women were randomised to no treatment.	No follow up numbers as not follow-up study.	No maternal baseline characteristics recorded or	Not follow-up study.	N/S pre-eclampsia (yet metformin (2; 4.7%) had fewer	Not studied	All women took metformin on study entry. (Wash-out period?)
	utero placental circulation of pregnant women with	(Sept 2008-Sept 2009)				a computer program and coincidence numbers arrangement are	Aged 18 to 40 years.	Rotterdam 2003 criteria.	per day).	per day).		reported.		incidence vs. untreated (4; 11.4%).
	PCOS. Iran J. Reprod. Med. (2012)	Trial registration no:				hidden in sealed envelopes that were calculated upon them".	Gestational age between 6-12 weeks.							N/S preterm delivery (yet metformin had fewer (2; 5.7%)
		RCT138812123485N1					Singleton viable pregnancy.		N=35 PCOS women were randomised to aspirin (80mg per day)					incidence vs. untreated (5; 11.4%).
							No history of diabetes mellitus or hypertension.		* not part of meta-analysis.					N/S GDM incidence (yet metformin (3; 8.6%) had fewer
														incidence vs. untreated (6; 17.1%).
														N/S IUGR
														N/S any adverse outcome (yet metformin had fewer
														incidence (4; 11.4%) vs. untreated (11; 31.4%)
2	Use of metformin to treat pregnant women	Norwegian cohort (Trondheim)	Lovvik	Norway	Randomised, placebo	Women were randomly assigned to receive metformin or placebo via	N=487 PCOS women were randomly assigned to	PCOS diagnosis criteria:	GDM screening?	N=243 PCOS randomly assigned to placebo.	No follow up numbers as not follow-up study.	N/S maternal baseline characteristics: Including age,	More preterm deliveries in metformin vs. placebo (p=0.11)	N/S spontaneous vaginal delivery.	Not studied	Women who used metformin at conception and in early pregnancy
	with polycystic ovary syndrome (PregMet2):	Trial registration no:			controlled, double-	computer-generated random numbers. Randomisation was in blocks	either metformin or placebo.	Rotterdam 2003 criteria.	N=244 PCOS women randomly assigned to metformin:	N=20 discontinued treatment; (n=17 withdrawals, n=1		weight, height, BMI, systolic & dystolic blood pressure,	N/S late miscarriage between groups (p=0.72)	N/S instrumental vaginal delivery.		had a washout period of at least 7 d before inclusion in the
	a randomised, double-blind, placebo-	NCT0158737			blind, multicentre trial.	of 10 for each country and centre; the 1st block had a random size	Inclusion criteria:	If there was no certain PCOS diagnosis before inclusion,	N=34 discontinued treatment; (n=29 withdrawals, n=2	termination of pregnancy, n=1 intrauterine fetal death &		FPG, 2hr PPG, smoking status, ethnic origin, education	Composite preterm & late miscarriage increased in metformin vs.	N/S C-section (overall; emergency & elective).		study.
	controlled trial. Lancet Diab. Endocrinol., 2019				(14 centres in Norway,	between 1 and 10 to assure masking.	Aged 18 - 45 years.	anamnestic data were gathered and medical files were	termination of pregnancy; n=2 intrauterine fetal death,	n=1 violation of protocol).		status, civil and working status.	placebo (p=0.08).	N/S postpartum haemorrage		Adherance rate to medication: >90%
					Iceland & Sweden).	Randomisation sequence was generated by personnel from the Unit	Singleton pregnancy.	checked to confirm diagnosis.	n=1 violation of protocol & n=1 lost to follow-up).	N=240 included in analysis (intention-to-treat).			N/S incidence of GDM (at inclusion).	N/S placental weight.
						of Applied Clinical Research, none of whom had any involvement in	Gestational age between 6-12 weeks (plus 6 days).		N=238 included in analysis (intention-to-treat).	Placebo capsules were identical to the metformin capsules.			N/S new incidence of GDM (after inclusion).	N/S birth weight & length.
						recruitment, assignment, or the rest of the trial. Placebo & metformin	Women with DM excluded.		Mothers randomised to metformin were given up to 2000mg				N/S hypertension in pregnancy.	Increased head circumference in metformin vs. placebo
						tablets were identical. In addition to masking of participants & study			per day.				Reduced preeclampsia in metformin vs.placebo (p=0.10).	(p=0.006).
						personnel, obstetricians not involved in the care or treatment of							N/S admission to hospital during pregnancy.	N/S 5 min Apgar Score.
						participants assessed the study outcomes, a statistician masked to							N/S transfer to NICU or readmittance of neonate to hospital.	N/S umbilical cord pH.
						the treatment allocation did the statistical analysis, and the design of							Reduced maternal weight gain in metformin vs. placebo.	N/S offspring sex.
						tables & figures were planned before the results were known.
3	Metformin versus placebo from first	Norwegian cohort (Trondheim)	Vanky E	Norway	Prospective, randomized,	"Randomization was performed at the Trondheim University	N=364 PCOS women assessed for eligibility.	At inclusion, no limitations were set on PCOS phenotype.	All study participants were screened for GDM at	All study participants were screened for GDM at	No follow up numbers as not follow-up study.	N/S maternal baseline characteristics: Including age,	More preterm deliveries in metformin vs. placebo (p=0.12).	N/S spontaneous vaginal delivery.	Not studied	Women who used metformin at conception and in early pregnancy
	trimester to delivery in polycystic ovary	Trial registration no:			double-blind, multicenter	Hospital Pharmacy in blocks of 10 (five metformin and five placebo)	(N=90 excluded).	The diagnosis of PCOS was based on documentation before the	randomisation (5-12 weeks), 19, 32 and 36 weeks.	randomisation (5-12 weeks), 19, 32 and 36 weeks.		weight, BMI, systolic & dystolic blood pressure,	More pre-eclampsia in metformin vs. placebo (p=0.18).	N/S induced delivery.		had a washout period of at least 7 d before inclusion in the
	syndrome: A randomized controlled,	NCT0158737			trial.	and stratified according to metformin use at conception.	N=274 randomized to study.	actual pregnancy, all diagnosed by a gynecologist.	GDM screening criteria:	GDM screening criteria:		resting heart rate, fasting & 2hr glucose, GDM,	N/S new incidence of GDM.	N/S vaginal, operative vaginal or C-section deliveries.		study.
	multi-center study. JCEM, 2010.					The method was random drawing of an envelope (ordered in	Aged 18 - 45 years.	PCOS women in this study were diagnosed by Rotterdam	A 75g OGTT was performed according to the World Health	A 75g OGTT was performed according to the World Health		metformin use at conception, mode of conception,	N/S composite outcomes.	N/S birth weight & length.
						groups of 10: five metformin and five placebo) by two pharmacy	Singleton pregnancy.	criteria and NIH criteria. (Women came from 11 study centres, 3	Organisation (1998).	Organisation (1998).		number of PCOS criteria met, spontaneous	Less pregnancy weight gain in metformin (p=0.01) vs. placebo.	N/S ponderal index
						employees, one executing the drawing and the other monitoring	Gestational age between 6-12 weeks (plus 6 days).	university hospitals, 7 local hospitals & 1 gynecological	N=136 with PCOS were randomly assigned to metformin	N=136 with PCOS were randomly assigned to placebo).		abortion & smoking status.	Preterm birth was less frequent among those who met NIH criteria	Increased head circumference in metformin vs.
						the drawing.	Women with DM excluded.	specialist practice).	(Up to 2000mg/day).	Placebo capsules were identical to the metformin			in the metformin group. Nevertheless, this finding should be	placebo (p=0.01).
						The enrolling doctor at the study centers faxed patient details		The authors analysed the data according to PCOS diagnosis	N=1 lost to follow-up.	capsules.			interpreted with caution because of multiple testing and post-hoc	N/S umbilical cord pH
						to the university pharmacy. The participants were allotted to		criteria and the use of the Rotterdam criteria widens the	N=135 women analysed.	N=			analyses.	N/S birth weight (<2500g).
						placebo or metformin, and the study medication was subsequently		diagnostic definition for PCOS compared with the NIH criteria,		N=135 women analysed.				N/S birth weight 2501-4500g.
						mailed to the participants. The participants and care providers		which is more conservative and strict.						N/S birth weight >4501g (yet less in metformin).
						were blinded for treatment allocation."

## Sheet: Met vs. placebo obese
Metformin vs. placebo (Maternal obesity)							Supplementary Table S3: Study characteristics
							Metformin vs. placebo (maternal obesity)
								Population randomisation criteria	Population randomisation criteria				Delivery & neonatal outcomes in	Offspring outcomes (in metformin group; unless stated)
Study no	Manuscript title	Trial Information	Lead author	Population cohort	Trial type	Randomisation details	Characteristics of trial participants	Metformin-treated group	placebo-treated group	Follow-up numbers & study details	Maternal characteristics (baseline)	Pregnancy outcomes or measures taken at follow-up	(metformin group; unless stated)	unless stated) (Follow-up studies)	Notes
1	Effect of metformin on maternal and fetal outcomes	UK multi-centre cohort (Feb 2011-Jan 2014)	Chiswick C	UK	Randomised, double-blind,	"Randomly assigned participants (1:1), via a web-based computer-	Aged ≥ 16 years.	N=4867 women screened for eligibility.	N=223 randomly allocated to placebo.	No follow up numbers as not follow-up study.	N/S maternal baseline characteristics	N/S gestational age at delivery.	N/S C-section	Not recorded.	All women screened for GDM at inclusion
	in obese pregnant women (EMPOWaR): a	Trial registration no: ISRCTN number 51279843			placebo-controlled trial.	generated block randomisation procedure (block size of two to four),	All white women with BMI ≥ 30kg/m2.	N=4418 excluded (n=2872 declined, n=730 in-eligible,	(Between 12-16 weeks until end of pregnancy).		including age, smoking & alcohol use,	N/S preterm delivery	N/S birth weight (normal or z-score).		(WHO criteria).
	randomised, double-blind, placebo-controlled				(15 centres in the UK)	to receive metformin or placebo.	Between 12-16 weeks of gestation.	n=752 uncontrollable, n=56 other reasons, n=8 did not	(N=1 withdrew before treatment).		educational status, medical history,	N/S preeclampsia or PIH	N/S SGA (<3 or 10 percentile).
	trial. The Lancet, Diab Endocrinol., (2015).					Randomisation was stratifi ed by study site and BMI band (30-39 vs.	Excluded pre-existing diabetes/GDM in previous pregn.	attend appointment.	N=222 received treatment.		family history, anthropometry (weight,	N/S development of GDM	N/S FPG, 2hr PPG, FPI, Homa-IR,
						≥40 kg/m²). Participants, caregivers, and study personnel were	N=4867 were screened for eligibility.	N=226 randomly allocated to metformin (500-2500mg	N=2 not analysed (n=2 terminations of pregnancy).		BMI, height, fat measurements), blood	N/S live birth (≥ 24 weeks gestation).	C-reactive protein, total cholesterol, HDL, LDL, trigs, NEFAs & leptin.
						masked to treatment assignment. Members of the independent	N=4414 excluded: (n=2872 declined to participate,	per day). (Between 12-16 weeks until end of pregnancy).	N=220 included in intention-to-treat analysis.		tests & putative father details.	N/S still-birth (≥ 24 weeks gestation) (p=0.11) (Yet 7 in met vs.	IL6 decreased in metformin group (p=0.01)
						Data Monitoring Committee had access to unmasked data reports,	n=730 ineligible, n=752 uncontactable, n=56 for other	(N=1 withdrew before treatment).	Treatment duration: 12-16 weeks gestation - delivery.			2 in placebo).	Increased serum cortisol in metformin vs. placebo (p=0.05).
						but had no contact with study participants".	reasons, n=8 did not attend appointment).	N=225 received treatment.	Mean dosage: Not recorded.			N/S maternal weight gain in pregnancy.	PI increased in metformin vs. placebo (p=0.08).
							N=496 randomly assigned to metformin or placebo	N=11 not analysed (n=2 stillbirths, n=4 miscarriages, n=1					Decreased NICU admission in metformin group (p=0.02)
								termination of pregnancy, n=3 withdrew after treatment					N/S neonatal death in delivery room or later stage.
								issued, n=1 lost to follow-up).
								N=214 included in intention-to treat analysis.
								Treatment duration: 12-16 weeks gestation - delivery.
								Mean dosage: Not recorded
2	Effect of metformin in addition to dietary and lifestyle	Australian cohort (multi-centre)	Dodd JM	Adelaide, Australia	Multicentre, randomised,	"Those women who consented to participate were randomly assigned	Age range not reported	N=3546 approached to participate.	N=263 randomly assigned to placebo.	No follow up numbers as not follow-up study.	N/S maternal baseline characteristics	N/S gestational age at birth.	N/S labour induction	Not recorded.
	advice for pregnant women who are overweight or obese:	Trial registration no: ACTRN12612001277831			double-blind, placebo-controlled	(1:1) to metformin or placebo, by use of a central online randomisation	Live singleton pregnancy.	N=3022 excluded (n=324 did not want to participate,	N=1 withdrew consent, n=2 had miscarriages before 20 weeks		including age, BMI, gestational age at	Reduced maternal weight gain in metformin (p=0.053).	More C-sections (all causes) in metformin (p=0.049).
	the GRoW randomised, double-blind, placebo-controlled				trial.	service. The computer-generated randomisation schedule utilised	Women were overweight (25-29.9kg/m2) or obese	n=481 did not want to take study medication, n=547	of pregnancy, n=2 had stillbirth after 20 weeks.		entry, BMI catergory, weight, height,	Reduced average weekly weight gain in metfomin (p=0.007).	More elective C-sections in metformin (p=0.052).
	trial. Lancet Diabetes Endocrinol, 7, 15-24 (2019)				(3 Adelaide maternity hospitals).	blocks of four and was prepared by an investigator not involved with	(≥30 kg/m2)	too busy or unable to attend study visits, n=531 'other	N=258 maternal and infant pairs included in the analysis.		ethnic origin, smoking status, parity,	N/S preterm birth (< 37 weeks gestation).	N/S emergency C-sections.
						recruitment or clinical care. Stratification occurred for parity (0 vs 1 or	Between 10-20 weeks of gestation.	reasons', n=1204 were not interested, uncontactable or	Treatment duration: 10-20 weeks gestation - delivery.		previous preterm birth, previous pre-	N/S preeclampsia or pregnancy-induced hypertension.	N/S birth weight
						more), BMI at antenatal booking visit (25.0-29.9kg/m2 vs. 30.0kg/m2)	Women with a multiple pregnancy, type 1 or 2 diabetes	did not give reason.	Mean dosage: Not recorded		eclampsia, previous still-birth or C-	N/S incidence of new GDM (after study start).	N/S birth weight > 4500g (macrosomia).
						and collaborating centre".	diagnosed prior to pregnancy were excluded.	N=524 consented and randomly assigned to metformin or			section, family history and socio-economic	N/S antenatal admission rates.	N/S LGA or SGA.
								placebo.			status.	N/S post-partum haemmorage requiring admission.	N/S admission to NICU or SCBU
								N=261 randomly assigned to metformin (500-200mg/day)				N/S preterm premature rupture of membranes.	N/S neonatal hypoglycaemia needing treatment.
								Treatment duration: 10-20 weeks gestation - delivery.					N/S hyperbilirubinaemia needing phototherapy.
								N=5 had miscarriages before 20 weeks/terminations.					N/S nerve palsy.
								N=256 maternal and infant pairs included in the analysis.					N/S birth trauma or shoulder dystocia.
								Mean dosage: Not recorded					N/S still-birth or neonatal death.
3	Metformin versus Placebo in Obese Pregnant women	UK cohort (London)	Syngelaki A	London, UK	Double-blind, placebo-controlled	Eligible women were randomly assigned, in a 1:1 ratio, with the use	Non-diabetic women with a BMI > 35kg/m2 who were	N=1071 non-GDM women with BMI > 35kg/m2 were	N=225 were randomised to placebo	No follow up numbers as not follow-up study.	N/S maternal baseline characteristics	N/S miscarriage, still-birth or neonatal death.	N/S mean birth weight (z-score).	Not recorded.	All women were screened for GDM at
	without Diabetes Mellitus. N Engl. J. Med, (2016)	Trial registration no: NCT01273584			trial.	of computer-generated random numbers, to receive either metformin	12-18 weeks gestation with a single viable pregnancy.	assessed for eligibility. N=227 were excluded (n=6 were <	N=27 withdrew consent		including age, weight, height, BMI,	N/S no of live-births			28 weeks gestation (WHO Criteria, 1999).
						or placebo. In the random sequence generation, there were no	Women were excluded if had a history of GDM	18 years, n=17 had fetal defect, n=66 had history of GDM,	N=198 were included in analysis		gestational age at randomisation, ethnicity,	N/S incidence of GDM (at 28 weeks). Met (12.3%) vs. placebo			75g OGTT
						restrictions, such as block size or stratification according to study site.		n=18 had medical problems, n=6 had gastric bypass, n=68			medical history, smoking status, mode of	(11.3%).			Women with abnormal values (even after
						The appearance, size, weight and taste of the placebo tablet were		had hyperemesis, n=25 were taking metformin, n=8			conception and parity.				home glucose monitoring were given
						identical to those of the metformin tablet.		could not take metformin & n=13 miscarried.							insulin supplements to their existing
								N=844 were eligible. (n=394 declined to participate)							regimen.
								N=450 underwent randomisation
								N=225 randomised to metformin (1000 to 3000mg per day)
								N=23 withdrew consent
								N=202 were included in analysis

## Sheet: Pre-gestational IR
Supplementary Table S3: Study characteristics
metformin vs. insulin (pre-gestational insulin-resistance)
									Population randomisation criteria	Population randomisation criteria
Study no	Manuscript title	Trial Information	Lead author	Population cohort	Trial type	Randomisation details	Characteristics of trial participants	GDM diagnosis criteria	Metformin-treated group	Insulin-treated group	Maternal characteristics (baseline)	Pregnancy outcomes or measures taken at follow-up	Delivery outcomes in (metformin group; unless stated)
1	Metformin as a prophylactic treatment of gestational	Chilian cohort (Santiago)	Valdes E	Chile	A double blind, multicenter,	Other than stating that the participants	N=144 women with a history of pre-insulin resistance were assessed for eligibility.	GDM diagnosis criteria:	N=68 randomised to metformin (1700mg per day).	N=73 randomised to placebo.	N/S Maternal age	GWG?	N/S gestational age
	diabetes in pregnant patients with pregestational insulin	Trial registration no: 494/11			randomized trial	were randomised to metformin or to	Women were singleton pregnancies with PIR	IADPSG	Randomised between 12-15 gestational weeks and used until 36 gw.	Randomised between 12-15 gestational weeks and used	N/S Pre-pregnancy BMI	N/S development of GDM	N/S preterm birth
	resistance: A randomized study					placebo - no other details of randomisation	N=3 excluded (declined participation)		N=20 lost to follow-up (n=1 GI intolerance; n=2 physician suggestion; n=17 not interested).	until 36 gw.	N/S Metformin use before pregnancy	N/S pre-eclampsia	N/S C-section rate
						were given in the paper.	All patients were evaluated with a OGTT at 24-28 gw and at 32 gw. GDM diagnosis criteria: Fasting glucose		N=48 analysed.		N/S Nulliparity
							>105 mg/dL or a 2-h glucose >140 mg/dL. In patients with a diagnosis of GDM, the therapy was suspended		N=10 lost to follow-up (n=2 change of institution, n=2 physician suggestion, n=6 not interested).		N/S Previous GDM
							and the management was performed to IADPSG.		N=63 analysed.		N/S 1st trimester fasting glucose
							PIR diagnosis criteria: The presence of abnormal values in fasting insulinemia test (≥15 uUI/mL)and/or
							homeostatic model assessment–insulin resistance (>2.6) and at least one of the PIR-suggestive clinical signs,
							such as acrochordons, acanthosis nigricans,or the diagnosis of PCOS.
