# Supplementary material for: Impact of metformin treatment during pregnancy on maternal outcomes: a systematic review/meta-analysis
Source: Research Square preprint supplement (doi:10.21203/rs.3.rs-112670/v1), 2020-11-30
Supplement: Supplementary file 15 [file b5150943561eff67285b377b.docx]

**Supplementary Table S7: Gastrointestinal side effects in women with diabetes in pregnancy randomised to metformin.**

| **First Author** |  | **Raw averages (%)** | **N** |
| --- | --- | --- | --- |
| Ainnudin, 2015 | GI side effects | 7 (8) | 93 |
| Stopped medication | 6 (6) | 93 |
| Ashoush, 2016 | GI side effects | 14 (30) | 47 |
| Stopped medication | 0 (0) | 47 |
| Ijas, 2011 | GI side effects | 3 (6) | 50 |
| Stopped medication | 3 (6) | 50 |
| Niromanesh, 2012 | GI side effects | 6 (8) | 80 |
| Stopped medication | 3 (4) | 80 |
| Rowan, 2008 | GI side effects | 32 (9) | 363 |
| Stopped medication | 7 (2) | 363 |
| Spaulonci, 2013 | GI side effects | 21 (46) | 46 |
| Stopped medication | 1 (2) | 46 |
| Tertti, 2013 | GI side effects | 2 (2) | 110 |
| Stopped medication | 2 (2) | 110 |
| Wasim, 2020 | GI side effects | 4 (3) | 137 |
| Stopped medication | 4 (3) | 137 |
| *Weighted average* | *GI side effects* | *12.5* | 929 |
| *Incidence (%)* | *Stopped medication* | *14.3* | 929 |
