# Supplementary material for: Impact of metformin treatment during pregnancy on maternal outcomes: a systematic review/meta-analysis
Source: Research Square preprint supplement (doi:10.21203/rs.3.rs-112670/v1), 2020-11-30
Supplement: Supplementary file 16 [file b871a2a4fe1cdb65f8ee6f3a.docx]

| **Metformin compared to any comparator for women prescribed metformin for any indication during pregnancy: Secondary outcomes** | | | | | |
| --- | --- | --- | --- | --- | --- |
| **Patient or population**: women prescribed metformin for any indication during pregnancy  **Setting**:  **Intervention**: Metformin  **Comparison**: Any comparator | | | | | |
| **Outcomes** | **№ of participants  (studies) Follow up** | **Certainty of the evidence (GRADE)** | **Relative effect (95% CI)** | **Anticipated absolute effects** | |
| **Risk with any comparator** | **Risk difference with Metformin** |
| C-section (all reasons) | 6122 (29 RCTs) | ⨁⨁⨁◯ MODERATE a | **OR 0.86** (0.73 to 1.01) | 425 per 1,000 | **36 fewer per 1,000** (75 fewer to 2 more) |
| Development of GDM | 2063 (7 RCTs) | ⨁⨁⨁◯ MODERATE b | **OR 1.07** (0.87 to 1.33) | 208 per 1,000 | **11 more per 1,000** (22 fewer to 51 more) |
| Glycaemic control: FBS | 3673 (19 RCTs) | ⨁⨁⨁◯ MODERATE c | - | The mean glycaemic control: FBS was **90.23** mg/dL | MD **0.45 mg/dL lower** (2.26 lower to 1.36 higher) |
| Glycaemic control: RBS | 3610 (18 RCTs) | ⨁⨁⨁◯ MODERATE d | - | The mean glycaemic control: RBS ranged from **115.47** mg/dL | MD **1.18 mg/dL lower** (2.64 lower to 0.28 higher) |
| Maternal hypoglycaemia | 1149 (6 RCTs) | ⨁⨁⨁◯ MODERATE e | **OR 0.47** (0.28 to 0.80) | 78 per 1,000 | **40 fewer per 1,000** (55 fewer to 15 fewer) |

**Supplementary Fig. S6: GRADE analysis – secondary outcomes**

| ***The risk in the intervention group** (and its 95% confidence interval) is based on the assumed risk in the comparison group and the **relative effect** of the intervention (and its 95% CI).   **CI:** Confidence interval; **OR:** Odds ratio; **MD:** Mean difference |
| --- |
| **GRADE Working Group grades of evidence** **High certainty:** We are very confident that the true effect lies close to that of the estimate of the effect **Moderate certainty:** We are moderately confident in the effect estimate: The true effect is likely to be close to the estimate of the effect, but there is a possibility that it is substantially different **Low certainty:** Our confidence in the effect estimate is limited: The true effect may be substantially different from the estimate of the effect **Very low certainty:** We have very little confidence in the effect estimate: The true effect is likely to be substantially different from the estimate of effect |

#### Explanations

a. The data set has a fairly high level of heterogeneity across the studies as evidenced by the I2 value (46%) and the accompanying significant p value (0.004).

b. Only n=7 studies were found for this outcome, most of which had large 95% CI intervals (related to small participant sizes).

c. The data set has a very high level of heterogeneity across the studies as evidenced by the I2 value (92%) and the accompanying p value (<0.00001).

d. The data set has a very high level of heterogeneity across the studies as evidenced by the I2 value (83%) and the accompanying significant p value (<0.00001)

e. Only n=6 studies were found for this outcome, most of which had large 95% CI intervals (related to relatively small participant sizes).

GRADE analysis for all secondary outcomes

C-section=ceserean-section; FBS=fasting blood glucose; RBS=random blood glucose; GDM=gestational diabetes mellitus; met=metformin; RCTs=randomised controlled trials.

Odds Ratio or mean difference (where appropriate) ± 95% CI. Fixed or random-effect models where appropriate.
