# Supplementary material for: Impact of metformin treatment during pregnancy on maternal outcomes: a systematic review/meta-analysis
Source: Research Square preprint supplement (doi:10.21203/rs.3.rs-112670/v1), 2020-11-30
Supplement: Supplementary file 19 [file db21aee1ebae49fa55d7a058.docx]

**Supplementary Table S6: Effect of metformin treatment upon side effects (vs. placebo: PCOS and maternal obesity)**

| Outcome |  | Unadjusted OR  (95% CI) | P value | Studies | N | Het. I2 | Het. P value |
| --- | --- | --- | --- | --- | --- | --- | --- |
| Nausea | Placebo | 1.44 (1.13-1.84) | .003 | 4 | 1441 | 0% | .51 |
| Vomiting | Placebo | 1.42 (1.10-1.84) | .008 | 4 | 1441 | 7% | .36 |
| Diarrhoea | Placebo | 2.73 (1.59-4.68) | .0003 | 4 | 1441 | 68% | .02 |
| Abdominal pain | Placebo | 1.00 (0.75-1.33) | .98 | 4 | 1242 | 0% | .45 |
| Bloating | Placebo | 1.32 (0.73-2.38) | .36 | 1 | 240 | N/A | N/A |
| Constipation | Placebo | 1.11 (0.76-1.63) | .59 | 2 | 797 | 15% | .28 |
| Headache | Placebo | 1.17 (0.82-1.69) | .39 | 2 | 797 | 69% | .07 |

Likelihood of side effects in PCOS and maternal obesity pregnancies treated with metformin

OR= Odds Ratio ± 95% CI. Het=Heterogeneity
